# Supplementary material
Source: publisher site journal article supplement (https://static.cambridge.org/content/id/urn:cambridge.org:id:article:S0003055420000672/resource/name/S0003055420000672supp001.pdf)
Supplement: Supplementary file 1 [file S0003055420000672supp001.pdf]

## Online Appendix

# “Electoral Accountability and Particularistic Legislation: Evidence from an Electoral Reform in Mexico”

Lucia Motolinia\*

---

\*Department of Politics, New York University. Contact: [lucia.motolinia@nyu.edu](mailto:lucia.motolinia@nyu.edu)

VARIATION IN REELECTION INCENTIVES FOR LEGISLATORS FACING ELECTIONS IN 2018

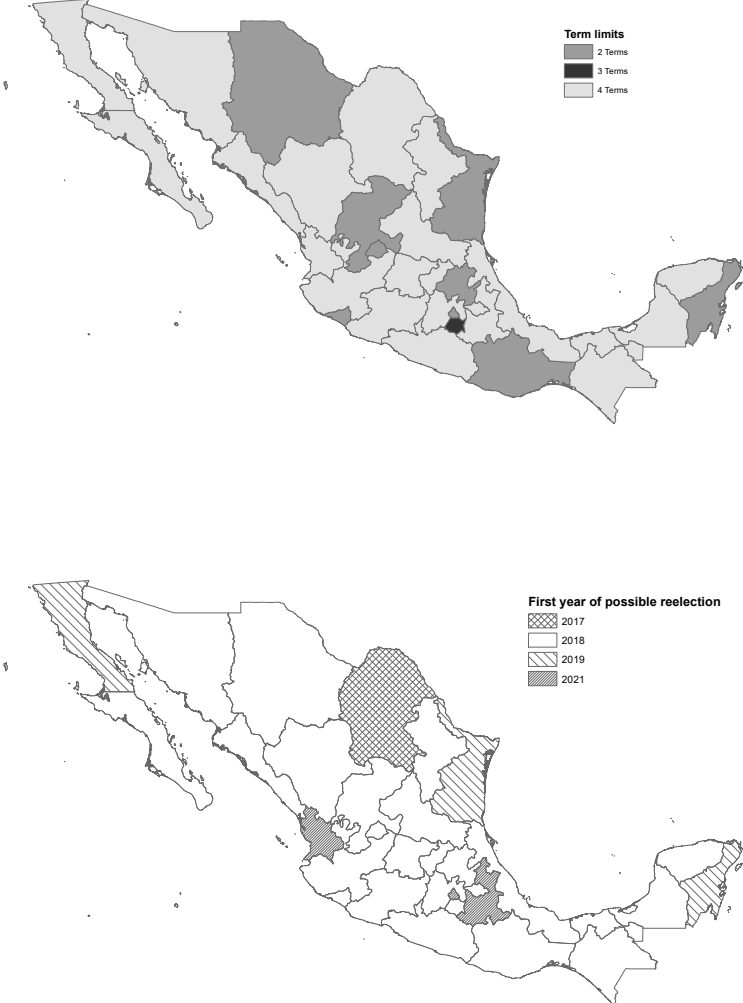

Figure A1: Distribution of states by the maximum number of terms local legislators can stay in office if reelected (Top). Distribution of states with respect of the first year local legislators can run for reelection (Bottom).

LEGISLATORS BY ELECTION TIER

**Table A1: Number of Legislators and their Election Tier per state in 2018.**

| State               | Total Number<br>of Legislators | Legislators elected<br>by FPP in SMD | Legislators<br>elected by PR |
|---------------------|--------------------------------|--------------------------------------|------------------------------|
| Aguascalientes      | 27                             | 18                                   | 9                            |
| Baja California     | 25                             | 16                                   | 9                            |
| Baja California Sur | 21                             | 16                                   | 5                            |
| Campeche            | 35                             | 21                                   | 14                           |
| Chiapas             | 40                             | 24                                   | 16                           |
| Chihuahua           | 33                             | 22                                   | 11                           |
| Ciudad de Mexico    | 66                             | 33                                   | 33                           |
| Coahuila            | 25                             | 16                                   | 9                            |
| Colima              | 25                             | 16                                   | 9                            |
| Durango             | 25                             | 15                                   | 10                           |
| Estado de Mexico    | 75                             | 45                                   | 30                           |
| Guanajuato          | 36                             | 22                                   | 14                           |
| Guerrero            | 46                             | 28                                   | 18                           |
| Hidalgo             | 30                             | 18                                   | 12                           |
| Jalisco             | 39                             | 20                                   | 19                           |
| Michoacan           | 40                             | 24                                   | 16                           |
| Morelos             | 20                             | 12                                   | 8                            |
| Nayarit             | 30                             | 18                                   | 12                           |
| Nuevo Leon          | 42                             | 26                                   | 16                           |
| Oaxaca              | 42                             | 25                                   | 17                           |
| Puebla              | 41                             | 26                                   | 15                           |
| Queretaro           | 25                             | 15                                   | 10                           |
| Quintana Roo        | 25                             | 15                                   | 10                           |
| San Luis Potosi     | 27                             | 15                                   | 12                           |
| Sinaloa             | 40                             | 24                                   | 16                           |
| Sonora              | 33                             | 21                                   | 12                           |
| Tabasco             | 35                             | 21                                   | 14                           |
| Tamaulipas          | 36                             | 22                                   | 14                           |
| Tlaxcala            | 25                             | 15                                   | 10                           |
| Veracruz            | 50                             | 30                                   | 20                           |
| Yucatan             | 25                             | 15                                   | 10                           |
| Zacatecas           | 30                             | 18                                   | 12                           |

Sources: Data is drawn from the state's constitutions.

ELECTORAL RETURNS IN 2015/16 OF LEGISLATORS WHO RAN FOR REELECTION IN 2018

**Table A2: Difference in means test of the electoral returns in 2015/16 of legislators who ran for Reelection in 2018, compared with legislators not renominated by their parties.**

|                                       | Did not run for<br>Reelection in 2018 | Ran for Reelection<br>in 2018 | Difference | P-value |
|---------------------------------------|---------------------------------------|-------------------------------|------------|---------|
| Vote Share in the<br>2015/16 Election | 35.022<br>(297)                       | 37.294<br>(100)               | -2.272     | 0.016   |

Number of observations in parenthesis. The sample includes only legislators elected in SSD in states where they could run for reelection in 2018.

## EXAMPLE SNAPSHOTS OF TRANSCRIPTS IN DIFFERENT STATES



1

**DIARIO DE DEBATES.**

**INTERVENCIONES DE LOS DIPUTADOS EN LA SESIÓN SOLEMNE DEL DÍA 20 DE JULIO DE 2015.**

---

**DIP. VÍCTOR TREJO CARPIO (PRESIDENCIA):**  
A CONTINUACIÓN SOLICITO AL DIPUTADO MIGUEL ÁNGEL ROMERO OLIVARES, PRESIDENTE DE LA COMISIÓN ESPECIAL PARA LA ENTREGA DE LA MEDALLA "DON MIGUEL HIDALGO Y COSTILLA Y LA PRESEA PEDRO MARÍA ANAYA", DE LECTURA A LA SEMBLANZA DEL DOCTOR NICOLÁS SOTO OLIVER.

**DIP. MIGUEL ÁNGEL ROMERO OLIVARES:**  
CON SU VENIA DIPUTADO PRESIDENTE.

(a) Hidalgo



**DIARIO DE LOS DEBATES**  
DE LA CÁMARA DE DIPUTADOS DEL CONGRESO DEL ESTADO DE GUANAJUATO  
AÑO I SESIÓN ORDINARIA LXII CONGRESO CONSTITUCIONAL DEL ESTADO NÚMERO 8  
GUANAJUATO, GTO., 8 NOVIEMBRE DE 2012

PODER LEGISLATIVO. H. SEXAGÉSIMA SEGUNDA LEGISLATURA DEL CONGRESO DEL ESTADO LIBRE Y SOBERANO DE GUANAJUATO. SESIÓN ORDINARIA. PRIMER AÑO DE EJERCICIO LEGAL. PRIMER PERÍODO ORDINARIO. SESIÓN CELEBRADA EL DÍA 8 DE NOVIEMBRE DEL AÑO 2012. 11

SUMARIO

- Lista de asistencia y comprobación del quórum. 3
- Lectura y en su caso, aprobación del orden del día. 3
- Lectura y, en su caso, aprobación del acta de la sesión ordinaria, celebrada el 7 de noviembre del año en curso. 5
- Dar cuenta con las comunicaciones y correspondencia recibidas. 7
- Presentación de la iniciativa formulada por la diputada y los diputados integrantes de la Junta de Gobierno y Coordinación Política ante la Sexagésima Segunda Legislatura, a efecto de reformar el artículo 60 A de la Ley de Fiscalización Superior del Estado de Guanajuato. 10
- Presentación de la iniciativa formulada por la diputada y los diputados integrantes de la Junta de Gobierno y Coordinación Política ante la Sexagésima Segunda Legislatura, a efecto de reformar los

artículos 132 y 250 y derogar la fracción XVI del artículo 59, todos de la Ley Orgánica del Poder Legislativo del Estado Libre y Soberano de Guanajuato. 13

Presentación de la propuesta de punto de acuerdo, suscrito por las diputadas y los diputados integrantes del Grupo Parlamentario del Partido Revolucionario Institucional, a efecto de que se formule un exhorto al Ejecutivo del Estado, para que de conformidad con el artículo 77 fracción VI de la Constitución Política Local, se adicione en la Ley de Presupuesto General de Egresos del Estado de Guanajuato, para el ejercicio fiscal del año 2013, la creación de un pando 33, a nivel estatal. 16

Presentación de la propuesta de punto de acuerdo, formulado por las diputadas y los diputados integrantes del Grupo Parlamentario del Partido Revolucionario Institucional, a efecto de que se establezcan en la próxima Ley de Ingresos para el Estado de Guanajuato, las disposiciones necesarias de carácter general para condonar créditos y multas fiscales, y reorganizar de ejecución ordinarios, por la omisión de pago de los impuestos anteriores al año 2011, y bajo las modalidades que acuerde la Secretaría de Finanzas, Inversión y Administración. 19

(b) Guanajuato

Sesión celebrada en la Ciudad de Tlaxcala de Xicohténcatl, Estado Libre y Soberano de Tlaxcala, el día martes 02 de Septiembre del año dos mil catorce.

**Presidencia del Diputado Juan Ascención Calyecac Cortero.**

A las doce horas con once minutos del día la Secretaría proceda a pasar lista de asistencia de los ciudadanos diputados que integran la Sexagésima Primera Legislatura y hecho lo anterior informe con su resultado, en vista de que existe quórum se declara legalmente instalada la sesión, por lo tanto, se pone a consideración el contenido del orden del día, el que se integra de los siguientes puntos:

1. LECTURA DEL ACTA DE LA SESIÓN ANTERIOR, CELEBRADA EL VEINTIOCHO DE AGOSTO DE DOS MIL CATORCE.
2. LECTURA DE LA INICIATIVA CON PROYECTO DE ACUERDO, POR EL QUE SE EXHORTA A LOS AYUNTAMIENTOS DEL ESTADO DE TLAXCALA Y A SU CORRESPONDIENTE COORDINACIÓN MUNICIPAL DE PROTECCIÓN CIVIL, PARA QUE DURANTE LOS FESTEJOS PATRIOS, ESTABLEZCAN ACCIONES DE PREVENCIÓN DE RIESGOS Y DE SEGURIDAD EN LA QUEMA DE ARTIFICIOS PIROTECNICOS Y VIGILEN E INHIBAN LA VENTA ILEGAL DE PIROTECNIA EN LAS TIENDITAS Y EN LOS TIANGUIS; QUE PRESENTA LA DIPUTADA CECILIA SAMPEDRO MINOR.
3. LECTURA DE LA PROPUESTA CON PROYECTO DE ACUERDO, POR EL QUE SE DESIGNA A LOS DIPUTADOS DE ESTA LXI LEGISLATURA QUE HABRAN DE INTEGRARSE A LA CONFERENCIA NACIONAL DE LEGISLADORAS Y LEGISLADORES CONTRA LA TRATA DE PERSONAS;

QUE PRESENTA LA JUNTA DE COORDINACIÓN Y CONCERTACIÓN POLÍTICA DEL CONGRESO DEL ESTADO.

4. CORRESPONDENCIA RECIBIDA POR ESTE CONGRESO.
5. ASUNTOS GENERALES

**Presidente:** Se somete a votación la aprobación del contenido del orden del día, quienes estén a favor porque se apruebe, sírvanse manifestar su voluntad de manera económica.

**Secretaría:** veintiocho votos a favor.

**Presidente:** Quiénes estén por la negativa de su aprobación, sírvanse manifestar su voluntad de manera económica.

**Secretaría:** cero votos en contra.

**Presidente:** De acuerdo a la votación emitida se declara aprobado el orden del día por mayoría de votos.

**Presidente:** Para desahogar el primer punto del orden del día, se pide a la Secretaría proceda a dar lectura al contenido del acta de la sesión ordinaria, celebrada el día veintiocho de agosto de dos mil catorce.

**INTERVENCIÓN DIPUTADO ÁNGEL XOCHITOTZIN HERNÁNDEZ**

Acta de la Octava Sesión del Segundo Período Ordinario de Sesiones de la Sexagésima Primera Legislatura, correspondiente a su Primer Año de Ejercicio Legal, celebrada el día veintiocho de agosto de dos mil catorce.

En la ciudad de Tlaxcala de Xicohténcatl, siendo las once horas con cuarenta y cinco minutos del día veintiocho de agosto de dos mil catorce, en la Sala de Sesiones del Palacio Juárez, Recinto

(c) Tlaxcala



**ESTADO LIBRE Y SOBERANO DE AGUASCALIENTES**  
PODER LEGISLATIVO

**LXII LEGISLATURA DE AGUASCALIENTES**

**HONORABLE CONGRESO DEL ESTADO**  
**DIPUTACIÓN PERMANENTE**  
**ACTA DE LA SESIÓN ORDINARIA,**  
**CELEBRADA EL 10 DE AGOSTO DEL AÑO 2016.**

En la Ciudad de Aguascalientes, Capital del Estado con el mismo nombre, en punto de las once horas con diez minutos, del día y fecha señalados, reunidos en el Salón Aguiles Eloyah García del Poder Legislativo, los Ciudadanos Diputados: Jesús Eduardo Bocas Álvarez, Adolfo Suárez Ramírez, Norma Aída Guzmán Saldaña, Angélica Muñoz Moreno, Marco Arturo Delgado Martín del Campo, Juan Francisco Ovalle García y Armando Acosta Rodríguez, en su calidad de Presidente, Vicepresidente, Secretarías, Prosecretario y Suplentes, respectivamente, de la Mesa Directiva de la Diputación Permanente, fue declarado el quórum legal y se iniciaron los trabajos de la Sesión Ordinaria de la Diputación Permanente, de conformidad al siguiente:

**ORDEN DEL DÍA**

- I. Lectura y aprobación en su caso del Acta de la Sesión Ordinaria de la Diputación Permanente, celebrada el miércoles 3 de agosto del año 2016.
- II. Asuntos en Carrera.
- III. Asuntos Generales.
- IV. Citar a la próxima Sesión Ordinaria de la Diputación Permanente.
- V. Clausura de los trabajos de la Sesión Ordinaria de la Diputación Permanente.

Aprobado el Orden del Día por la unanimidad de los Diputados presentes, la Presidencia de la Mesa Directiva, en términos de lo dispuesto por la normatividad interna del Poder Legislativo, solicitó a la Ciudadana Diputada Anayeli Muñoz Moreno, diere a conocer a la Diputación Permanente, el Acta de la Sesión anterior, celebrada el 3 de agosto del año 2016, en cumplimiento a lo dispuesto por el Artículo 44, Fracción V de la Ley Orgánica del Poder Legislativo y conforme al Artículo 137, Fracción III del propio Reglamento, la cual sometida a votación económica, fue aprobada por la unanimidad de los Diputados presentes.

**Acta de la Diputación Permanente del 10 de agosto del año 2016** Página 1

(d) Aguascalientes

Figure A2: Examples of the differences in format and quality of the transcripts in Hidalgo, Aguascalientes, Tlaxcala and Guanajuato.

NUMBER OF SESSIONS AND ELECTORAL YEARS PER STATE

**Table A3: Distribution of sessions and electoral years per State, election years corresponds to the timing of treatment assignment**

| State            | Number of Sessions<br>(documents) | Electoral years  |
|------------------|-----------------------------------|------------------|
| Aguascalientes   | 142                               | 2013, 2016, 2018 |
| Campeche         | 514                               | 2012, 2015, 2018 |
| Chiapas          | 458                               | 2012, 2015, 2018 |
| Chihuahua        | 390                               | 2013, 2016, 2018 |
| Ciudad de Mexico | 392                               | 2012, 2015, 2018 |
| Colima           | 467                               | 2012, 2015, 2018 |
| Durango          | 485                               | 2013, 2016, 2018 |
| Estado de Mexico | 402                               | 2012, 2015, 2018 |
| Guanajuato       | 249                               | 2012, 2015, 2018 |
| Guerrero         | 589                               | 2012, 2015, 2018 |
| Hidalgo          | 197                               | 2013, 2016, 2018 |
| Jalisco          | 168                               | 2012, 2015, 2018 |
| Oaxaca           | 107                               | 2013, 2016, 2018 |
| Puebla           | 433                               | 2010, 2013, 2018 |
| Queretaro        | 82                                | 2012, 2015, 2018 |
| Sinaloa          | 252                               | 2013, 2016, 2018 |
| Tabasco          | 303                               | 2012, 2015, 2018 |
| Tlaxcala         | 352                               | 2013, 2016, 2018 |
| Veracruz         | 224                               | 2013, 2016, 2018 |
| Zacatecas        | 687                               | 2013, 2016, 2018 |

DESCRIPTIVE STATISTICS: PROPORTION OF DISCUSSION ALLOCATED TO TYPES OF LEGISLATION BY STATE

**Table A4: Proportion of discussion allocated to different types of legislation by State.**

| State            | Particularistic | General | Procedural |
|------------------|-----------------|---------|------------|
| Aguascalientes   | 0.036           | 0.289   | 0.675      |
| Campeche         | 0.070           | 0.335   | 0.595      |
| Ciudad de Mexico | 0.091           | 0.465   | 0.444      |
| Chiapas          | 0.054           | 0.575   | 0.371      |
| Chihuahua        | 0.090           | 0.449   | 0.461      |
| Colima           | 0.098           | 0.502   | 0.400      |
| Durango          | 0.067           | 0.531   | 0.402      |
| Guanajuato       | 0.055           | 0.696   | 0.249      |
| Guerrero         | 0.078           | 0.504   | 0.418      |
| Hidalgo          | 0.100           | 0.463   | 0.437      |
| Jalisco          | 0.076           | 0.486   | 0.438      |
| Mexico           | 0.079           | 0.379   | 0.543      |
| Oaxaca           | 0.065           | 0.387   | 0.548      |
| Puebla           | 0.063           | 0.391   | 0.545      |
| Queretaro        | 0.094           | 0.412   | 0.494      |
| Sinaloa          | 0.099           | 0.476   | 0.424      |
| Tabasco          | 0.066           | 0.495   | 0.439      |
| Tlaxcala         | 0.062           | 0.508   | 0.429      |
| Veracruz         | 0.128           | 0.509   | 0.363      |
| Zacatecas        | 0.069           | 0.325   | 0.606      |

DESCRIPTIVE STATISTICS: PROPORTION OF DISCUSSION ALLOCATED TO EACH POLICY TYPE

**Table A5: Summary Statistics for all proportion of sessions allocated to each type of policy.**

---

| Variable        | Mean  | Std. Dev. | Min.  | Max.  | Observations |
|-----------------|-------|-----------|-------|-------|--------------|
| Particularistic | 0.076 | 0.096     | 0.000 | 0.900 | 6890         |
| General         | 0.457 | 0.213     | 0.016 | 0.974 | 6890         |
| Procedural      | 0.467 | 0.225     | 0.011 | 0.983 | 6890         |

---



DIFFERENCE IN MEANS COMPARING LEGISLATORS IN DIFFERENT ELECTORAL CYCLES

**Table A6: Difference in means comparing legislators who ran in 2012/13 and those who ran 2015/16**

|                                              | Elected in<br>2012/13 | Elected in<br>2015/16 | Difference | P-value |
|----------------------------------------------|-----------------------|-----------------------|------------|---------|
| Education Years                              | 7.649<br>(439)        | 7.444<br>(464)        | 0.205      | 0.177   |
| Years of Political<br>Experience (Any)       | 8.142<br>(450)        | 8.349<br>(470)        | -0.207     | 0.603   |
| Years of Political<br>Experience (Appointed) | 5.982<br>(448)        | 6.220<br>(469)        | -0.237     | 0.504   |
| Years of Political<br>Experience (Elected)   | 2.196<br>(448)        | 2.143<br>(470)        | 0.054      | 0.784   |

Number of observations in parenthesis. The sample includes legislators with Long-Term Reelection Incentives and those with No Reelection in 2018.

**Table A7: Difference-in-differences estimator for H1 controlling for the 2018 Gubernatorial Elections.**

---

| Dependent Variable: Proportion of Discussion<br>allocated to Particularistic Legislation |           |
|------------------------------------------------------------------------------------------|-----------|
| Legislative Period                                                                       | 0.01437** |
| X Long-Term Reelection Incentives                                                        | [0.00581] |
| Legislative Period                                                                       | 0.01462   |
| X 2018 Gubernatorial Elections                                                           | [0.00955] |
| State Fixed Effects                                                                      | Yes       |
| Month-Year Fixed Effects                                                                 | Yes       |
| Observations                                                                             | 4,899     |
| R-squared                                                                                | 0.08184   |

---

Robust standard errors clustered on the State level in brackets

\*\*\* p<0.01, \*\* p<0.05, \* p<0.1

Table A8: Difference-in-differences estimator for HI controlling for a battery of State characteristics.

|                                      | Dependent Variable: Proportion of Discussion allocated to Particularistic Legislation |           |           |            |           |            |           |           |           |           |           |
|--------------------------------------|---------------------------------------------------------------------------------------|-----------|-----------|------------|-----------|------------|-----------|-----------|-----------|-----------|-----------|
| L. Period                            | 0.01387**                                                                             | 0.01460*  | 0.01302*  | 0.01383*   | 0.01608** | 0.01374*   | 0.01416*  | 0.01413*  | 0.01447*  | 0.01683** | 0.01464** |
| X Long-Term Reelection Incentives    | [0.00631]                                                                             | [0.00703] | [0.00690] | [0.00650]  | [0.00675] | [0.00704]  | [0.00702] | [0.00692] | [0.00691] | [0.00732] | [0.00622] |
| L. Period X Pop in Poverty (Income)  | 1.34813***                                                                            |           |           |            |           |            |           |           |           |           |           |
|                                      | [0.27460]                                                                             |           |           |            |           |            |           |           |           |           |           |
| L. Period X Pop in Poverty (Social)  |                                                                                       | 0.13102   |           |            |           |            |           |           |           |           |           |
|                                      |                                                                                       | [0.25343] |           |            |           |            |           |           |           |           |           |
| L. Period X Exports                  |                                                                                       |           | 0.00003   |            |           |            |           |           |           |           |           |
|                                      |                                                                                       |           | [0.00003] |            |           |            |           |           |           |           |           |
| L. Period X Immigration              |                                                                                       |           |           | 0.00032*** |           |            |           |           |           |           |           |
|                                      |                                                                                       |           |           | [0.00007]  |           |            |           |           |           |           |           |
| L. Period X Emigration               |                                                                                       |           |           |            | 0.00013   |            |           |           |           |           |           |
|                                      |                                                                                       |           |           |            | [0.00015] |            |           |           |           |           |           |
| L. Period X Homicides                |                                                                                       |           |           |            |           | 6.01086    |           |           |           |           |           |
|                                      |                                                                                       |           |           |            |           | [14.46308] |           |           |           |           |           |
| L. Period X Population               |                                                                                       |           |           |            |           |            | 0.00006   |           |           |           |           |
|                                      |                                                                                       |           |           |            |           |            | [0.00007] |           |           |           |           |
| L. Period X Pop with Social Security |                                                                                       |           |           |            |           |            |           | 0.00010   |           |           |           |
|                                      |                                                                                       |           |           |            |           |            |           | [0.00012] |           |           |           |
| L. Period X State Income             |                                                                                       |           |           |            |           |            |           |           | 0.00004   |           |           |
|                                      |                                                                                       |           |           |            |           |            |           |           | [0.00006] |           |           |
| L. Period X State Income from Taxes  |                                                                                       |           |           |            |           |            |           |           |           | 0.00111   |           |
|                                      |                                                                                       |           |           |            |           |            |           |           |           | [0.00082] |           |
| L. Period X Federal Transfers        |                                                                                       |           |           |            |           |            |           |           |           |           | 0.00020   |
|                                      |                                                                                       |           |           |            |           |            |           |           |           |           | [0.00011] |
| State Fixed Effects                  | Yes                                                                                   | Yes       | Yes       | Yes        | Yes       | Yes        | Yes       | Yes       | Yes       | Yes       | Yes       |
| Month-Year Fixed Effects             | Yes                                                                                   | Yes       | Yes       | Yes        | Yes       | Yes        | Yes       | Yes       | Yes       | Yes       | Yes       |
| Observations                         | 4,899                                                                                 | 4,899     | 4,899     | 4,899      | 4,899     | 4,899      | 4,899     | 4,899     | 4,899     | 4,899     | 4,899     |
| R-squared                            | 0.08108                                                                               | 0.08062   | 0.08071   | 0.08112    | 0.08061   | 0.08059    | 0.08068   | 0.08068   | 0.08065   | 0.08119   | 0.08084   |

Robust standard errors clustered on the State level in brackets

\*\*\* p<0.01, \*\* p<0.05, \* p<0.1

**Table A9: Difference-in-differences estimator for H3 controlling for PRI Governors.**

| Dependent Variable: Proportion of Discussion allocated to Particularistic Legislation |            |
|---------------------------------------------------------------------------------------|------------|
| Legislative Period                                                                    | 0.02601*** |
| X Expected Term Lengths                                                               | [0.00506]  |
| Legislative Period                                                                    | 0.00190    |
| X PRI Governors                                                                       | [0.00306]  |
| State Fixed Effects                                                                   | Yes        |
| Month-Year Fixed Effects                                                              | Yes        |
| Observations                                                                          | 6,062      |
| R-squared                                                                             | 0.08138    |

Robust standard errors clustered on the State level in brackets

\*\*\* p<0.01, \*\* p<0.05, \* p<0.1

**Table A10: Difference-in-differences estimator for H3 controlling for Legislator Covariates.**

| Dependent Variable: Proportion of Discussion allocated to Particularistic Legislation |            |            |            |            |
|---------------------------------------------------------------------------------------|------------|------------|------------|------------|
| Legislative Period                                                                    | 0.02641*** | 0.02443*** | 0.02452*** | 0.02624*** |
| X Expected Term Lengths                                                               | [0.00803]  | [0.00772]  | [0.00711]  | [0.00593]  |
| L. Period X Education Years                                                           | -0.00005   |            |            |            |
|                                                                                       | [0.00129]  |            |            |            |
| L. Period X Years of Pol. Experience (Any)                                            |            | 0.00060    |            |            |
|                                                                                       |            | [0.00144]  |            |            |
| L. Period X Years of Pol. Experience (Appointed)                                      |            |            | 0.00085    |            |
|                                                                                       |            |            | [0.00169]  |            |
| L. Period X Years of Pol. Experience (Elected)                                        |            |            |            | -0.00001   |
|                                                                                       |            |            |            | [0.00236]  |
| State Fixed Effects                                                                   | Yes        | Yes        | Yes        | Yes        |
| Month-Year Fixed Effects                                                              | Yes        | Yes        | Yes        | Yes        |
| Observations                                                                          | 6,062      | 6,062      | 6,062      | 6,062      |
| R-squared                                                                             | 0.08135    | 0.08149    | 0.08156    | 0.08135    |

Robust standard errors clustered on the State level in brackets

\*\*\* p<0.01, \*\* p<0.05, \* p<0.1

Table A11: Difference-in-differences estimator for H3 controlling for a battery of State characteristics.

|                                      |                      | Dependent Variable: Proportion of Discussion allocated to Particularistic Legislation |                       |                        |                       |                        |                       |                       |                       |                       |                      |
|--------------------------------------|----------------------|---------------------------------------------------------------------------------------|-----------------------|------------------------|-----------------------|------------------------|-----------------------|-----------------------|-----------------------|-----------------------|----------------------|
| L. Period                            | 0.02499***           | 0.02684***                                                                            | 0.02650***            | 0.02440***             | 0.03469***            | 0.02648***             | 0.02645***            | 0.02658***            | 0.02696***            | 0.02646***            | 0.02600***           |
| X Long-Term Reel. Incent.            | [0.00510]            | [0.00527]                                                                             | [0.00520]             | [0.00509]              | [0.01035]             | [0.00523]              | [0.00549]             | [0.00540]             | [0.00585]             | [0.00604]             | [0.00563]            |
| L. Period X Pop in Poverty (Income)  | 0.72703<br>[0.84247] | -0.06412<br>[0.47651]                                                                 |                       |                        |                       |                        |                       |                       |                       |                       |                      |
| L. Period X Pop in Poverty (Social)  |                      |                                                                                       |                       |                        |                       |                        |                       |                       |                       |                       |                      |
| L. Period X Exports                  |                      |                                                                                       | -0.00001<br>[0.00002] |                        |                       |                        |                       |                       |                       |                       |                      |
| L. Period X Immigration              |                      |                                                                                       |                       | 0.00027**<br>[0.00011] |                       |                        |                       |                       |                       |                       |                      |
| L. Period X Emigration               |                      |                                                                                       |                       |                        | -0.00225<br>[0.00210] |                        |                       |                       |                       |                       |                      |
| L. Period X Homicides                |                      |                                                                                       |                       |                        |                       | -4.39852<br>[11.89020] |                       |                       |                       |                       |                      |
| L. Period X Population               |                      |                                                                                       |                       |                        |                       |                        |                       |                       |                       |                       |                      |
| L. Period X Pop with Social Security |                      |                                                                                       |                       |                        |                       |                        | -0.00001<br>[0.00014] |                       |                       |                       |                      |
| L. Period X State Income             |                      |                                                                                       |                       |                        |                       |                        |                       | -0.00002<br>[0.00023] |                       |                       |                      |
| L. Period X State Income from Taxes  |                      |                                                                                       |                       |                        |                       |                        |                       |                       | -0.00002<br>[0.00014] |                       |                      |
| L. Period X Federal Transfers        |                      |                                                                                       |                       |                        |                       |                        |                       |                       |                       | -0.00022<br>[0.00242] |                      |
| State Fixed Effects                  | Yes                  | Yes                                                                                   | Yes                   | Yes                    | Yes                   | Yes                    | Yes                   | Yes                   | Yes                   | Yes                   | 0.00002<br>[0.00036] |
| Month-Year Fixed Effects             | Yes                  | Yes                                                                                   | Yes                   | Yes                    | Yes                   | Yes                    | Yes                   | Yes                   | Yes                   | Yes                   | Yes                  |
| Observations                         | 6,062                | 6,062                                                                                 | 6,062                 | 6,062                  | 6,062                 | 6,062                  | 6,062                 | 6,062                 | 6,062                 | 6,062                 | 6,062                |
| R-squared                            | 0.08147              | 0.08137                                                                               | 0.08139               | 0.08166                | 0.08268               | 0.08139                | 0.08135               | 0.08136               | 0.08137               | 0.08136               | 0.08135              |

Robust standard errors clustered on the State level in brackets

\*\*\* p<0.01, \*\* p<0.05, \* p<0.1

SENSITIVITY TEST FOR PARALLEL TRENDS FOR H1

**Table A12: Balance tables for legislators' relevant covariates by treatment assignment.**

|                                              | No reelection  | Long-Term<br>Reelection Incentives | Difference | P-value |
|----------------------------------------------|----------------|------------------------------------|------------|---------|
| Education Years                              | 7.592<br>(98)  | 7.666<br>(341)                     | -0.074     | 0.776   |
| Years of Political<br>Experience (Any)       | 8.105<br>(105) | 8.154<br>(345)                     | -0.049     | 0.943   |
| Years of Political<br>Experience (Appointed) | 6.257<br>(105) | 5.898<br>(343)                     | 0.359      | 0.551   |
| Years of Political<br>Experience (Elected)   | 1.848<br>(105) | 2.303<br>(343)                     | -0.456     | 0.168   |

Number of observations in parenthesis.

## TESTS ON THE MECHANISM

In Mexico, politicians holding public office that want to run for an elected position need to step out of their posts before campaigns and pre-campaigns start. They ask for a temporary leave commonly known as *licencia*. These rules apply to most local legislators running for reelection in 2018.<sup>1</sup> This period corresponds on average to approximately 3 months before the election. Thus, by the start of the *licencia* period, parties have already selected which legislators are running for reelection. Since legislators running for reelection are absent during this period, we can determine whether it is a party strategy to engage in more particularistic legislation later in the electoral cycle. If the incentive to get reelected is driving our findings, we should find no shift towards particularistic legislation during the *licencia* period, since legislators in office at this time know they are not running for reelection.

**Table A13: Differences-in-Differences estimator of Long-Term Reelection Incentives on the proportion of discussion allocated to particularistic legislation restricting the sample to the *licencias* period.**

| Dependent Variable: Proportion of Discussion<br>allocated to Particularistic Legislation |           |
|------------------------------------------------------------------------------------------|-----------|
| Legislative Period                                                                       | 0.00131   |
| X Long-Term Reelection Incentives                                                        | [0.00759] |
| State Fixed Effects                                                                      | Yes       |
| Month-Year Fixed Effects                                                                 | Yes       |
| Observations                                                                             | 218       |
| R-squared                                                                                | 0.19500   |

Robust standard errors clustered on the State level in brackets

\*\*\* p<0.01, \*\* p<0.05, \* p<0.1

Mexico is a federal system and states are subnational political units with independent executives and legislative bodies. The federal system granted states the authority to self-

<sup>1</sup>Some states do not require legislators running for reelection to step out of their office.

determine the number legislators that would comprise their legislatures (Art. 115 of the Mexican Constitution). Thus, there is variance across states in the number of legislators elected in SSDs and those elected in closed lists by PR. This variance implies that local-level SSDs are population-balanced within the state but not across different states. For example, while legislators in Estado de Mexico represent over 200,000 constituents, in Campeche each legislator only represents slightly over 25,000 individuals. State-level SSDs differ to the federal-level SSDs, with the former being drawn according to the national population and the latter concerning the population of each state. First we calculated the proportion of each legislature elected in SSDs. Then, we leverage this variance to estimate the marginal effect of the difference-in-difference estimator (tested in Hypothesis 1) at different proportions of the legislature elected in SSDs. We expect that higher percentages of the legislature elected in SSDs lead to larger average marginal effects of the difference-in-differences estimator because a larger proportion of legislators elected in SSDs implies more legislators looking to cultivate their personal vote.

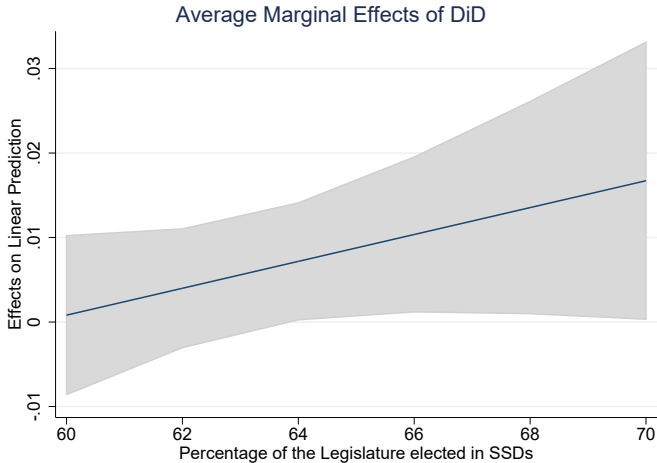

**Figure A3: Average marginal effect of the DiD estimator at different percentages of the legislature elected in SSDs**



**Table A14: Differences-in-Differences estimator of Long-Term  
Reelection Incentives on the proportion of discussion allocated to  
different types of particularistic legislation.**

|                                                            | Dependent Variable: Proportion of Discussion<br>allocated to different types of Particularistic Legislation |                         |                       |                      |                      |
|------------------------------------------------------------|-------------------------------------------------------------------------------------------------------------|-------------------------|-----------------------|----------------------|----------------------|
|                                                            | Unions                                                                                                      | Transfers               | Programs/<br>Goods    | Awards/<br>Honors    | Infrastructure       |
| Legislative Period<br>X Long-Term<br>Reelection Incentives | 0.00075<br>[0.00217]                                                                                        | 0.00571***<br>[0.00182] | 0.00447*<br>[0.00222] | 0.00083<br>[0.00218] | 0.00350<br>[0.00271] |
| State Fixed Effects                                        | Yes                                                                                                         | Yes                     | Yes                   | Yes                  | Yes                  |
| Month-Year Fixed Effects                                   | Yes                                                                                                         | Yes                     | Yes                   | Yes                  | Yes                  |
| Observations                                               | 4,899                                                                                                       | 4,899                   | 4,899                 | 4,899                | 4,899                |
| R-squared                                                  | 0.09110                                                                                                     | 0.06249                 | 0.06019               | 0.05254              | 0.06352              |

Robust standard errors clustered on the State level in brackets

\*\*\* p<0.01, \*\* p<0.05, \* p<0.1

**Table A15: Particularistic Types Classification**

| Type            | Topic | Label                               | Type          | Topic | Label                                  |
|-----------------|-------|-------------------------------------|---------------|-------|----------------------------------------|
| awards/honors   | 374   | awards/honors                       | program/goods | 78    | board of professionals                 |
| awards/honors   | 110   | awards/honors                       | program/goods | 196   | conflict resolution<br>with protesters |
| awards/honors   | 334   | awards/honors                       | program/goods | 258   | communal land holder                   |
| awards/honors   | 120   | awards/honors                       | program/goods | 163   | LP Gas distribution                    |
| awards/honors   | 139   | awards/honors                       | program/goods | 382   | wage and salaries<br>tabulator         |
| infraestructure | 442   | aqueduct                            | program/goods | 349   | scholarships                           |
| infraestructure | 260   | street lighting                     | program/goods | 332   | mining industry                        |
| infraestructure | 391   | renovation of highway<br>section    | transfers     | 144   | fiscal transfers                       |
| infraestructure | 195   | sewer system                        | transfers     | 291   | fiscal transfers                       |
| infraestructure | 449   | renovation                          | transfers     | 83    | fiscal transfers                       |
| infraestructure | 183   | renovation                          | transfers     | 363   | municipal loans                        |
| infraestructure | 359   | renovation                          | transfers     | 25    | development fiduciary                  |
| infraestructure | 38    | sanitation plant                    | transfers     | 188   | incentives to small<br>businesses      |
| infraestructure | 423   | UNAM campus                         | transfers     | 309   | farming subsidy                        |
| program/goods   | 287   | supply of books<br>for library      | transfers     | 318   | subsidy on summer<br>rate              |
| program/goods   | 369   | library archive update              | transfers     | 424   | subsidies to civil<br>organizations    |
| program/goods   | 141   | community canteen                   | unions        | 313   | teachers evaluation                    |
| program/goods   | 216   | urban equipment                     | unions        | 169   | labor unions                           |
| program/goods   | 399   | urban equipment                     | unions        | 307   | labor unions                           |
| program/goods   | 387   | youth championship<br>event         | unions        | 254   | teacher's union                        |
| program/goods   | 417   | decent housing program              | unions        | 173   | pensions                               |
| program/goods   | 68    | sports event                        |               |       |                                        |
| program/goods   | 179   | supply of medicines<br>for hopsital |               |       |                                        |
| program/goods   | 288   | disabled permit                     |               |       |                                        |
| program/goods   | 114   | unitary value of land               |               |       |                                        |
| program/goods   | 187   | unitary value of land               |               |       |                                        |
| program/goods   | 230   | unitary value of land               |               |       |                                        |
| program/goods   | 252   | unitary value of land               |               |       |                                        |
| program/goods   | 190   | meter range update                  |               |       |                                        |
| program/goods   | 107   | cancellation of fines               |               |       |                                        |
| program/goods   | 304   | transport concession                |               |       |                                        |
| program/goods   | 330   | indigenous communities              |               |       |                                        |
| program/goods   | 145   | indigenous tongues                  |               |       |                                        |

RESULTS FOR H2 BY LEGISLATIVE PERIOD

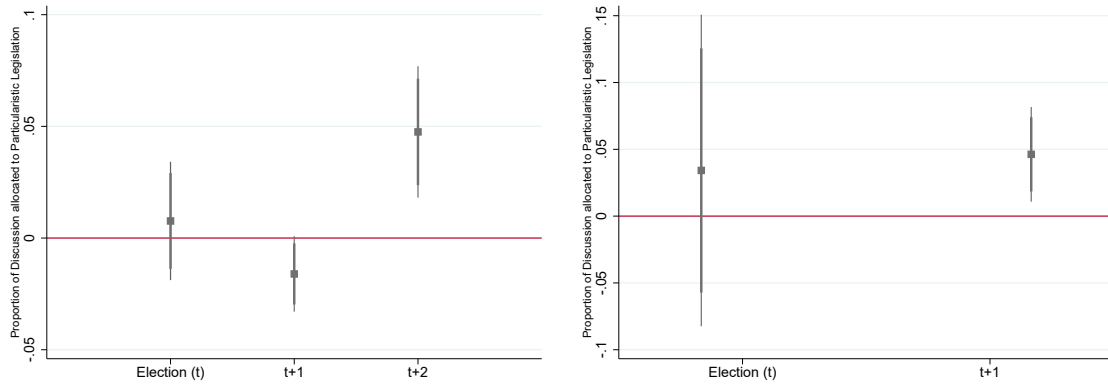

(a) States with Long-Term Reelection Incentives in the Legislative Period 2015-2018 (b) States with Long-Term Reelection Incentives in the Legislative Period 2016-2018

Figure A4: Results are derived from computing the effect of Long-Term Reelection Incentives but restricting the sample on each model only for comparable years before and after the election. All models have State Fixed Effects, Month-Year Fixed Effects and robust clustered standard errors at the state level. Vertical lines span 90% and 95% confidence intervals.

SENSITIVITY TEST FOR PARALLEL TRENDS FOR H3

**Table A16: Balance tables for legislators' relevant covariates by treatment assignment.**

|                                              | Short-Term<br>Reelection Incentives | Long-Term<br>Reelection Incentives | Difference | P-value |
|----------------------------------------------|-------------------------------------|------------------------------------|------------|---------|
| Education Years                              | 7.539<br>(152)                      | 7.666<br>(341)                     | -0.126     | 0.595   |
| Years of Political<br>Experience (Any)       | 9.690<br>(155)                      | 8.154<br>(345)                     | 1.537      | 0.014   |
| Years of Political<br>Experience (Appointed) | 7.619<br>(155)                      | 5.898<br>(343)                     | 1.721      | 0.002   |
| Years of Political<br>Experience (Elected)   | 2.084<br>(154)                      | 2.303<br>(343)                     | -0.219     | 0.435   |

Number of observations in parenthesis.

## ROBUSTNESS TEST FOR H1

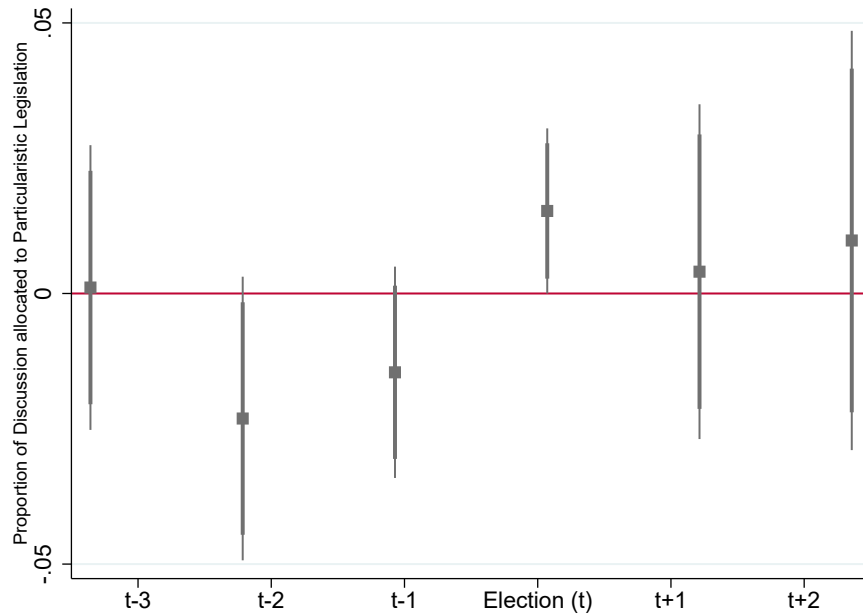

Figure A5: Robustness test for H1. Results are derived from six regression models with the proportion of speech allocated to particularistic legislation as the dependent variable and a different assignment of the timing of treatment in separate regressions. All models have State Fixed Effects, Month-Year Fixed Effects and robust clustered standard errors at the state level. Vertical lines span 95% confidence intervals.

## HAUSMAN TEST

$$H0 : [\beta T_t \times R_s] - [\beta T_t \times LS_s] = 0$$

$$chi2(1) = 2.17$$

$$Prob > chi2 = 0.1406$$

| Policy          | Topic | Label                               | Words                                                                   |
|-----------------|-------|-------------------------------------|-------------------------------------------------------------------------|
| particularistic | 25    | development fiduciary               | trust, fiduciary, committee, truster, shed                              |
| particularistic | 38    | sanitation plant                    | residual, plan, sanitation, hydraulic, water                            |
| particularistic | 68    | sports event                        | sport, athlete, physical, culture, baseball                             |
| particularistic | 78    | board of professionals              | profession, bachelor's degree, nursing, surgery, professional           |
| particularistic | 83    | fiscal transfers                    | presuppose, expenses, assign, treasury, item                            |
| particularistic | 107   | cancellation of fines               | reload, property tax, condone, fine, tax payer                          |
| particularistic | 110   | awards and honors                   | prize, winner, category, merit, accountability                          |
| particularistic | 114   | unitary value of land               | rustic, unit, ground, developer, tax                                    |
| particularistic | 120   | awards and honors                   | aptitude, outstanding, talent, carefully, favor                         |
| particularistic | 139   | awards and honors                   | medal, award, merit, athletics, bronze                                  |
| particularistic | 141   | community canteen                   | feed, food, feeding, waste, altruistic                                  |
| particularistic | 144   | fiscal transfers                    | assignment, collect, to assign, distribution, didactic                  |
| particularistic | 145   | indigenous tongues                  | language, indigenous, custom, community, tongue                         |
| particularistic | 163   | LP Gas distribution                 | gas, liquefied petroleum, consumer, PROFECO, pipe                       |
| particularistic | 169   | labor unions                        | laborer, clothing, agricultural, union, treasury                        |
| particularistic | 173   | pensions                            | loan, quotation, level, rightful owner, pensioner                       |
| particularistic | 179   | supply of medicines for hospital    | hospital, medicines, doctor, patient, nurse                             |
| particularistic | 183   | renovation                          | commission, municipality, paint, classroom, plan                        |
| particularistic | 187   | unitary value of land               | unit value, transparency portal, land, attach, scroll                   |
| particularistic | 188   | incentives to small businesses      | competitiveness, regulatory, entrepreneur, business, company            |
| particularistic | 190   | meter range update                  | bimonthly, meter, range, lower, residential                             |
| particularistic | 195   | sewer system                        | sewer, drinkable, sanitation, semester, rate                            |
| particularistic | 196   | conflict resolution with protesters | dialog, conflict, solution, governance, solve                           |
| particularistic | 216   | urban equipment                     | urban, settlement, territorial, town, urbanization                      |
| particularistic | 230   | unitary value of land               | tabulation, value, unit value, gym, to update                           |
| particularistic | 252   | unitary value of land               | land registry, zoning, value, land, accounting                          |
| particularistic | 254   | labor unions                        | teacher's union, teacher, professor, union, diploma                     |
| particularistic | 258   | communal land holder                | communal, agrarian, communal land, communal land holder, regularization |
| particularistic | 260   | street lighting                     | land registry, agreement, precede, administrative, street lighting      |
| particularistic | 287   | supply of books for library         | library, book, shuffle, editorial, literary                             |
| particularistic | 288   | disabled permit                     | discount, card, credential, preferential, handicapped                   |
| particularistic | 291   | fiscal transfers                    | ranking, amount, disbursement, allocation of transfers, spend           |
| particularistic | 304   | transport concession                | transport, taxi, passenger, transport company, concessionaire           |
| particularistic | 307   | labor unions                        | worker, labor, union, lay off, employ                                   |
| particularistic | 309   | farming subsidy                     | SEDATU, subsidy, clause, rescue, farming                                |

| Policy          | Topic | Label                                   | Words                                                            |
|-----------------|-------|-----------------------------------------|------------------------------------------------------------------|
| particularistic | 313   | teachers evaluation                     | teacher, education, evaluation, school (v), professional         |
| particularistic | 318   | subsidy on summer rate                  | electricity, fee, energy, CFE, temperature                       |
| particularistic | 330   | indigenous communities forum            | indigenous, ethnicity, community, native, lag                    |
| particularistic | 332   | mining industry                         | miner, mining, industry, company, employ                         |
| particularistic | 334   | awards and honors                       | medal, professional career, institute (v), deserving, nomination |
| particularistic | 349   | scholarships                            | scholarship, stimulus, dropout, student, pupil                   |
| particularistic | 359   | renovation                              | cabin, paving, calendar, rate, renovation                        |
| particularistic | 363   | municipal loans                         | bank, credit, BANOBRRAS, loan, retain                            |
| particularistic | 369   | library archive update                  | library, editorial, numeral, update, contractor                  |
| particularistic | 374   | awards and honors                       | award, cooperative, promotion, rank, original                    |
| particularistic | 382   | wage and salaries tabulator             | wage, salary, tabulator, pay, valuation                          |
| particularistic | 387   | youth championship event                | parliament, youth, championship, young, student                  |
| particularistic | 391   | renovation of highway section           | highway, section, freeway, walking, kilometer                    |
| particularistic | 399   | urban equipment                         | metropolitan, planning, territorial, zone, mobility              |
| particularistic | 417   | decent housing program                  | housing, dignified, INFONAVIT, residential, decent               |
| particularistic | 423   | university campus                       | university, provost, autonomous, academic, campus                |
| particularistic | 424   | subsidies to civil organizations        | organization, incentive, stimulus, civil, encourage              |
| particularistic | 442   | aqueduct                                | watershed, aquifer, dam, aqueduct, cubic                         |
| particularistic | 449   | renovation                              | work, paving, rehabilitate, infrastructure, kilometer            |
| general         | 1     | performance of general servants         | servant, general, administration, function, clerk                |
| general         | 2     | hearings                                | hearing, appear before, format, gloss, questioning               |
| general         | 5     | income of municipalities                | income, fiscal, treasury, municipality, law                      |
| general         | 9     | audits                                  | audit (v), supervisory, body, count, resources                   |
| general         | 10    | reelection                              | reelection, suffrage, effective, re-elect, attentive             |
| general         | 12    | centenary of 1917 Constitution          | constitution, centenary, Mexican, unite, political               |
| general         | 20    | procurement                             | procurement, hire, authorization, financial, acquisition         |
| general         | 22    | military                                | air force, weapon, navy, army, fire                              |
| general         | 23    | legal services                          | service, legal, summon, justify, bargain                         |
| general         | 24    | asset disposal                          | disincorporate, regularize, allotment, donate, land              |
| general         | 30    | income law                              | fiscal, count, income, present, law                              |
| general         | 33    | guardianship                            | adolescent, childhood, guardianship, custody, DIF                |
| general         | 37    | license to temporary remove from office | license, separate, undefined, office, function                   |
| general         | 43    | marriage                                | marriage, to get married, couple, concubinage, sex               |
| general         | 44    | selection of magistrates                | license, magistrate, civility, judicial, usher                   |
| general         | 47    | Trans Pacific Partnership               | zone, region, special, influence, member                         |

| Policy  | Topic | Label                                      | Words                                                          |
|---------|-------|--------------------------------------------|----------------------------------------------------------------|
| general | 48    | selection of councilors                    | institute, councilor, eligibility, approve, appoint            |
| general | 49    | health and diseases                        | shoulder, surgical lock, surgical, arm, tumor                  |
| general | 51    | selection of magistrates                   | magistrate, tribunal, supernumerary, court, justice            |
| general | 54    | agreement of town halls                    | volume, blueprint, agreement, gazette, to attached             |
| general | 56    | freedom of religion and movement           | discrimination, discriminatory, preference, religion, remove   |
| general | 58    | anti-corruption                            | anti-corruption, corruption, fight, committee, system          |
| general | 60    | innovation and technology                  | science, innovation, technology, scientific, technological     |
| general | 61    | challenge of the electoral sentence        | objection, instructor, challenge, judgment, nullity            |
| general | 64    | audits                                     | audit (v), afford, oversee, remarks, recommendation            |
| general | 65    | fiscal discipline                          | austerity, save money, spend, rationality, reduction           |
| general | 67    | acquittal of civil servants                | civil servant, acquittal, judge, decentralized, engage         |
| general | 69    | students disappearance in Ayotzinapa       | Ayotzinapa, rural teachers, repression, Excelsior, students    |
| general | 70    | transfers by formula                       | fund, transfer, infrastructure, resources, allocate            |
| general | 72    | child care centers                         | look after, kindergarten, center, provider, integral           |
| general | 74    | increase in fines                          | update, unit, fine, measure, equivalent                        |
| general | 73    | resignation of councils                    | resign, council, councilor, to accept, non-revocable           |
| general | 79    | promotion of actions by Governor           | state, executive, action, promote, establish                   |
| general | 84    | Spanish heritage                           | Spanish, province, chronicler, Spain, tradition                |
| general | 85    | new taxation                               | taxpayer, impose, contribution, charge, tax                    |
| general | 88    | Pacto por Mexico                           | EPN, republic, Senate, senator, country                        |
| general | 90    | health and diseases                        | health, kidney, sanitary, disease, doctor                      |
| general | 94    | natural disasters fund                     | peso, million, quantity, amount, figure                        |
| general | 97    | fishing                                    | aquaculture, fishing, fish, species, capture                   |
| general | 100   | pre-campaigns                              | polling station, coalition, candidate, propaganda, independent |
| general | 101   | financial assessment of the Laguna Region  | lagoon, Laguna Region, accountant, greet, engineer             |
| general | 102   | organ transplants                          | transplant, tissue, donor, cell, donate                        |
| general | 106   | municipal autonomy                         | federal, demarcation, mayoralty, adviser, remove               |
| general | 108   | selection of magistrates                   | resume, experience, master degree, residence, reputation       |
| general | 111   | territorial boundaries                     | limits, vertex, topographical, precision, territorial          |
| general | 115   | constitutional controversy                 | supreme court, cut, unconstitutional, justice, country         |
| general | 117   | inclusion of individuals with disabilities | handicap, accessibility, inclusion, person, television         |
| general | 118   | citizen's council                          | municipality, inhabitant, city council, locality, to call      |
| general | 123   | health and diseases                        | terminal, to anticipate, to get sick, palliative, proselytism  |
| general | 125   | education                                  | school, student, educational, education, primary school        |
| general | 128   | criminal proceeding                        | precautionary, impute, judge, to offend, ministry              |



| Policy  | Topic | Label                                   | Words                                                                       |
|---------|-------|-----------------------------------------|-----------------------------------------------------------------------------|
| general | 129   | audits                                  | peso, million, audit (v), remark, accounting                                |
| general | 131   | addictions                              | addiction, drug, alcohol, marijuana, substance                              |
| general | 133   | Special prosecutor                      | prosecutors office, specialized, ministry, agent, prosecution               |
| general | 138   | license to temporary remove from office | city council members, proportional, separate, representation, definitive    |
| general | 142   | gender equality                         | equality, gender, women, men, equity                                        |
| general | 143   | challenge of sentence                   | administrative, contentious, chamber, court, regional                       |
| general | 148   | farming                                 | cattle rancher, livestock, product, cattle, slaughterhouse                  |
| general | 149   | asset/land disposal                     | adjoin, distance, area, plot, transfer                                      |
| general | 150   | oil exploration/extraction              | hydrocarbon, stabilization, oil, exploration, extraction                    |
| general | 152   | freedom of speech                       | journalist, journalism, expression, defender, press                         |
| general | 155   | pension dependents                      | widowhood, affirmative, equivalent, ascribe, instruction                    |
| general | 156   | agriculture and farming                 | producer, agriculture, SAGARPA, farming, agricultural                       |
| general | 158   | security                                | general attorney, ascertainment, prosecution authorities, robbery, criminal |
| general | 159   | audits                                  | component, evince, assessment, audit, remark                                |
| general | 160   | audits                                  | entity, accounting, remark, honesty, breach                                 |
| general | 161   | cost of certificates                    | salary, minimum, issue, duplicate, record                                   |
| general | 164   | victims of human trafficking            | victim, eradicate, crime, injure, human trafficking                         |
| general | 167   | migration                               | migrant, migration, foreign, origin, return                                 |
| general | 170   | conciliation and arbitration            | arbitration, conciliation, arbitration award, contract, productive          |
| general | 171   | human rights                            | human, advisory, rights, violation, recommendation                          |
| general | 175   | femicides                               | femicide, homicide, engagement, deprivation, victim                         |
| general | 176   | asset disposal                          | control, abandon, seize, insurance, administrator                           |
| general | 177   | candidate selection                     | announcement, candidate, selection, glimpse, aspirant                       |
| general | 178   | DIF transition                          | expiration, reception, deliver, outgoing, incoming                          |
| general | 180   | transparency                            | subject, obliged, applicant, confidential, classification                   |
| general | 181   | decentralized autonomous bodies         | decentralized, body, autonomous, organ, establish                           |
| general | 182   | environmental pollution                 | tree, pollution, environment, pollutant, pollute                            |
| general | 184   | criminal proceeding                     | hearing, argument, expert witness, proof, arrest                            |
| general | 185   | mayoralty development                   | mayoralty, neighbor, demarcation, town, leadership                          |
| general | 189   | guardianship                            | adoption, tutor, birth, minor, guardianship                                 |
| general | 191   | criminal proceeding                     | opening, accusation, judiciary, visual, report                              |
| general | 192   | tourism                                 | touristy, tourism, magic town, tourist, attractive                          |
| general | 193   | evidentiary value                       | observable, evidentiary, termination, check, documentary                    |
| general | 194   | crime prevention                        | crime, prevention, community, violence, observatory of violence             |
| general | 197   | procurement                             | bidding, lease, provider, bidder, awarding                                  |

| Policy  | Topic | Label                                     | Words                                                         |
|---------|-------|-------------------------------------------|---------------------------------------------------------------|
| general | 198   | school bullying                           | harass, school, harassment, bullying, sexuality               |
| general | 199   | family                                    | father, son, mother, family, home                             |
| general | 205   | transit and roads                         | road, driver, transit, accident, motorcycle                   |
| general | 206   | maritime licenses                         | license, maritime, seashore, warming, region                  |
| general | 207   | elections                                 | candidacy, parity, proportional, candidate, independent       |
| general | 208   | vehicular fleet                           | van, invoice, brand, model, ford                              |
| general | 209   | childhood protection                      | infancy, child, childhood, age, minor                         |
| general | 210   | torture                                   | torture, disappearance, asylum, cruel, degrading              |
| general | 211   | renovation                                | pipe, quota, cement, mix, modern                              |
| general | 212   | poverty                                   | poverty, extreme, hunger, CONEVAL, shortcomings               |
| general | 213   | appointment of magistrates                | appointment, name, three persons, appoint, interim            |
| general | 215   | audits                                    | indicator, recommendation, matrix, audit, to place            |
| general | 217   | elections                                 | electoral, INE, contend, impartiality, candidate              |
| general | 219   | animal protection                         | animal, abuse, cruelty, dog, circus                           |
| general | 220   | transport concessions                     | mobility, concession, transport, vehicle, engine              |
| general | 226   | plebiscite                                | participatory, plebiscite, referendum, turnout, voter         |
| general | 227   | contractors                               | contractor, construction, execution, execute, estimate        |
| general | 228   | maternal lactation                        | lactation, breastmilk, maternal, mother, exclusive            |
| general | 229   | asset disposal                            | meter, squared, area, adjoining, centimeter                   |
| general | 231   | poverty                                   | inseparable, poverty, honest, honesty, criticism              |
| general | 233   | definition of paternity                   | initial conditions, paternity, methodology, opinion, formula  |
| general | 234   | evaluation plan                           | planning, plan, program, evaluate, coordinate                 |
| general | 235   | diversity and tolerance                   | tolerance, diversity, tolerant, respect, intolerance          |
| general | 236   | accommodation and textile services        | textile, lodgment, inter-municipal, metropolitan, hotel       |
| general | 239   | monument conservation                     | monument, mural, anthropology, INAH, conservation             |
| general | 240   | damages payments                          | damage, compensation, patrimonial, reparation, cause          |
| general | 241   | academic executive board                  | executive, board, academic, statute, remove                   |
| general | 242   | removal from office                       | invariant, repeal, parity, candidate, lauder                  |
| general | 243   | city councils                             | faculty, councilor, prosecutor, perform, council              |
| general | 244   | exhorts to the executive                  | encourage, respectfully, respectful, head, federative         |
| general | 245   | legislative information system            | discover, procedural, transparency portal, address, hierarchy |
| general | 246   | abortion                                  | pregnancy, reproductive, obstetric, maternity, abortion       |
| general | 248   | mayoralities development                  | mayoralty, urban, neighborhood, land property, neighbor       |
| general | 249   | certification of dependents and seniority | appoint, dependent, category, certificate, seniority          |
| general | 250   | police                                    | policemen, police, criminal, security, insecurity             |

| Policy  | Topic | Label                          | Words                                                        |
|---------|-------|--------------------------------|--------------------------------------------------------------|
| general | 251   | artisans and crafts            | artisan, intangible, crafts, merchandising, tradition        |
| general | 253   | homophobia/Aids                | Aids, HIV, homophobia, infection, transmission               |
| general | 255   | elections                      | district, count, council, ballot, voter                      |
| general | 257   | homicides                      | homicide, crime, kill, killing, deplorable                   |
| general | 259   | procurement                    | society, contractor, deprive, bid, investor                  |
| general | 261   | extortion                      | abolition, headship, extort, salary, dependence              |
| general | 263   | digital technology             | digital, substitution, electronic, normative, technology     |
| general | 264   | environmental protection       | ecological, environment, ecosystem, equilibrium, natural     |
| general | 265   | mosquito transmitted diseases  | dengue, zika, chikungunya, carrier, virus                    |
| general | 267   | higher education               | technological, school, polytechnic, baccalaureate, education |
| general | 268   | punishment of crimes           | prison, punishment, crime, perpetrate, steal                 |
| general | 269   | audits                         | punishment, disregard, resolve, alleged, warning             |
| general | 270   | audits                         | reinstate, entity, audit, member, strategic                  |
| general | 271   | judicial system                | judicial, judiciary, judge (v), judge (n), jurisdictional    |
| general | 272   | notaries                       | notary, notarial, notarized, deed, appendix                  |
| general | 273   | sale of alcoholic beverages    | box, alcoholic, counter, drink, viability                    |
| general | 275   | discussions about COPECOL      | club, migrant, migration, soccer, Chicago                    |
| general | 276   | civic infractions              | offender, offense, pyrotechnics, civic, arrest               |
| general | 277   | critique to the opposition     | opposition, plurality, criticize, left, parliamentary group  |
| general | 279   | sewage system                  | unload, administrative boundary, waste, use, debt            |
| general | 280   | garbage collection             | waste, garbage, solid, landfill, collection                  |
| general | 283   | candidate accreditation        | credential, simple, sign, birth, certify                     |
| general | 284   | transparency                   | transparency, information, access, data, accountability      |
| general | 286   | sales of alcoholic beverages   | alcoholic, drink, alcohol, business line, sale               |
| general | 289   | parking regulation             | parking, space, shopping, mall, distinctly                   |
| general | 292   | transfers by formula           | formula, inform, presentation, collect, financial envelope   |
| general | 293   | restructuring of debt          | debt, loan, funding, credit, refinancing                     |
| general | 296   | youth employment               | young, age, youth, employment, opportunity                   |
| general | 297   | vulnerable citizens            | adult, autistic, spectrum, autism, aging                     |
| general | 298   | religious temples              | parcel of land, noise, highlands, deed, chapel               |
| general | 299   | music/musicians                | music, orchestra, musical, tourist, sound                    |
| general | 302   | asset disposal                 | disincorporated, useless, automotive, auction, lane          |
| general | 305   | electoral positions of AMLO    | airplane, INFONAVIT, around, positioning, barrel             |
| general | 306   | overseeing of general servants | alleged, researcher, disablement, server, skilled            |
| general | 308   | imports                        | border, IVA, import, systemic, customs                       |

| Policy  | Topic | Label                                    | Words                                                                |
|---------|-------|------------------------------------------|----------------------------------------------------------------------|
| general | 310   | agricultural and farming                 | rural, farming, aquaculture, sustainable, productive                 |
| general | 311   | floodlight and saving lamps              | light (v), floodlight, lamp, led, electricity                        |
| general | 312   | cut of federal expenses for oncology     | cut, federation, oncology, spending, concurrent                      |
| general | 314   | constitutional reform                    | minute, senator, federal, turn, senate                               |
| general | 315   | general security                         | disaster, general safety, risk, firefighter, emergency               |
| general | 316   | entertainment license                    | room, section, linear, mile, entertainment                           |
| general | 319   | divorce                                  | divorce, conjugal, matrimonial, parental, estrangement               |
| general | 320   | asset/land disposal                      | donate, land property, property, dispose of, area                    |
| general | 321   | increase in oil prices and federal taxes | gasoline, cost, fuel, diesel, IEPS                                   |
| general | 322   | general security                         | police, security, operative, corporation, professionalize            |
| general | 323   | PEMEX workers petition                   | petition, qualify, proposal, PEMEX, dismiss                          |
| general | 324   | media promotion of crafts                | unify, craft, television, tortilla, radio                            |
| general | 325   | audits                                   | recommendation, repeal, audit, oversee, performance                  |
| general | 326   | audits                                   | afford, Santander (bank), floating asset, warning, current liability |
| general | 329   | reforms to the pension system            | pension (n), old age, retire, pension (v), retirement                |
| general | 331   | railway system                           | enlisted, railway line, train, replacement, communal                 |
| general | 335   | anti-corruption                          | audit, tax, fine, administrative, control                            |
| general | 337   | kidnappings                              | centimeter, drama, kidnap, attorney, file                            |
| general | 340   | municipal town hall                      | municipal, municipality, town hall, council, governing               |
| general | 341   | police legitimate aggression             | legitimate, proactive, aggression, defend, police                    |
| general | 343   | criminal proceeding                      | legal defense, defender, attorney, counsel, economic support         |
| general | 344   | ratification of appointments             | confirmation, ratify, name, hearing, task                            |
| general | 345   | compensation to victims                  | victim, aggrieve, compensation, rape, counsel                        |
| general | 346   | INAI commissioners                       | commissioner, guarantor, body, occupancy, autonomous                 |
| general | 347   | topical hospitals                        | topical, reduce, communal, hospital, blindness                       |
| general | 348   | transfers by formula                     | contribution, subsidiary, revenue, usage, tax revenue                |
| general | 350   | survey result                            | Internet, worldwide, average, OECD, INEGI                            |
| general | 351   | types of real estate                     | housing, density, residential, rural, industrial                     |
| general | 352   | obesity disorder                         | obesity, overweight, diabetes, habits, disorder                      |
| general | 353   | gender violence                          | violence, alert, eradicate, women, gender                            |
| general | 354   | law enforcement                          | law enforcement, attorney general, report, justice, advocacy         |
| general | 355   | legal documents                          | pages in a legal document, consistent, document, notable, suggest    |
| general | 357   | popular savings bank                     | alignment, defraud, cooperative, savings bank, savings               |
| general | 358   | audits                                   | afford, OFS, audit (v), entity, monitoring                           |
| general | 361   | inversion                                | invest, challenge, investment, republican, build                     |
| general | 366   | estate agents                            | competition, estate, ties, agent, meter                              |

| Policy  | Topic | Label                           | Words                                                              |
|---------|-------|---------------------------------|--------------------------------------------------------------------|
| general | 367   | migration                       | countryman, con-national, migration, Trump, foreign                |
| general | 368   | tax revenues                    | fiscal package, tax revenues, remnant, reclassification, estimate  |
| general | 370   | debt to pay payroll             | payroll, deficit, debt, money, provider                            |
| general | 371   | selection of councilors         | council, representative, councilor, appoint, director              |
| general | 372   | Coahuila's electoral fraud      | Coahuila, electoral fraud, residence, counting, locate             |
| general | 373   | anti-corruption comptroller     | comptroller, controller-ship, attached, corruption, accountability |
| general | 375   | civil registry                  | rectification, birth, erroneously, error, surname                  |
| general | 376   | agricultural safety             | vegetable, plague, health, safety, agricultural                    |
| general | 377   | income law                      | salary, endorse, chapter, license, rate                            |
| general | 378   | corruption                      | comment, corrupt, six years, corruption, segment                   |
| general | 379   | forest fires                    | forest, fire, reforestation, ecosystem, sustainable                |
| general | 380   | criminal proceeding             | criminal, code, accusatory, procedural, implementation             |
| general | 381   | teen reinsertion                | mortgage, repeal, proceed, teenager, inverse                       |
| general | 383   | foreign affairs                 | proposal, Cuba, mobility, sovereignty, negative                    |
| general | 384   | audiovisual art                 | cinematographic, audiovisual, cinema, industry, film               |
| general | 385   | telecommunications              | telecommunication, television, radio, broadcasting, telephony      |
| general | 386   | climate change                  | climate change, mitigation, adaptation, greenhouse, emission       |
| general | 388   | commemoration of battle         | battle, Colonel, heroic, French, troop                             |
| general | 390   | conservation of botanic gardens | park, extinction, garden, conservation, rescue                     |
| general | 392   | reinsertion of inmates          | penitentiary, sentencing, reinsertion, sentenced, prisoner         |
| general | 393   | housing meter                   | wall, land property, line, meter, housing                          |
| general | 394   | executory sentences             | legal protection, thesis, district, executory, sentence            |
| general | 395   | audits                          | auditable, entity, audit (n), oversee, audit (v)                   |
| general | 396   | commemorative coins             | down, syndrome, silver, coin, range                                |
| general | 397   | vaccination                     | influenza, vaccinate, virus, vaccination, contagious               |
| general | 398   | education                       | day, week, primary school, teacher, middle school                  |
| general | 402   | mental disorders                | mental, disorder, suicide, transmissible, depression               |
| general | 403   | civil registry                  | Administrative Office, process, justify, registration, system      |
| general | 406   | health/cancer detection         | cancer, detection, prostate, mortality, diagnose                   |
| general | 407   | general debt                    | financing, irrevocable, contract, formalize, credit                |
| general | 408   | mandate repeal                  | democracy, repeal, mandate, minority, governing                    |
| general | 409   | natural disasters               | flood, rain, pluvial, season, torrential                           |
| general | 410   | commemoration of anniversary    | commemoration, anniversary, commemorate, religious, laic           |
| general | 411   | immaterial heritage             | immaterial, cultural, heritage, party, tradition                   |
| general | 413   | renewable energy                | renewable, energetic, energy, clean, efficiency                    |
| general | 414   | gambling games                  | casino, gamble, play, raffle, slot machine                         |

| Policy  | Topic | Words                                                              |
|---------|-------|--------------------------------------------------------------------|
| general | 416   | income law                                                         |
| general | 418   | Energy Reform                                                      |
| general | 419   | railroad system                                                    |
| general | 420   | assessment of magistrates                                          |
| general | 422   | natural disasters                                                  |
| general | 425   | culture                                                            |
| general | 427   | legitimate defense                                                 |
| general | 428   | sustainable production of mezcal                                   |
| general | 429   | miscellaneous                                                      |
| general | 430   | accusatory system/bicycle path                                     |
| general | 431   | real estate registration                                           |
| general | 432   | elected officials' immunity                                        |
| general | 433   | tobacco use                                                        |
| general | 434   | medical procedures                                                 |
| general | 437   | audits                                                             |
| general | 439   | license plate exchange                                             |
| general | 438   | agencies' missions                                                 |
| general | 441   | debtors of child support                                           |
| general | 445   | personal data protection                                           |
| general | 447   | tax on vehicular tenure                                            |
| general | 448   | permits                                                            |
|         |       | revoke, procedure, observation, accounting, financial envelope     |
|         |       | PEMEX, oil, oil-producer, energy, hydrocarbon                      |
|         |       | railroad, marginalization, fading, tax, strategy                   |
|         |       | magistrate, excellence, assess, immovability, judge                |
|         |       | earthquake, disaster, hurricane, reconstruction, damage            |
|         |       | art, artistic, culture, museum, artist                             |
|         |       | arrest, arm, legitimate, injury, force                             |
|         |       | discipline, agave, mezcal, balance, sustainable                    |
|         |       | mission, brother, shaft, welfare, airport                          |
|         |       | operationally, consolidation, accusatory, instrument, bicycle      |
|         |       | condominium, auditor, administrator, treasurer, holder             |
|         |       | elected officials' immunity, immunity, impunity, revoke, privilege |
|         |       | smoke (n), tobacco, smoking, smoke (v), tobacco use                |
|         |       | MRI, x-ray, pathology, surgical, column                            |
|         |       | audit, auditor, superior, audit (v), revision                      |
|         |       | accord, license plate, inventory, substantive, exchange            |
|         |       | song, agency, dismiss, accolade, craftsman                         |
|         |       | debtor, child support, defaulting, creditor, alimentary            |
|         |       | data, personal, privacy, handling, responsible                     |
|         |       | growth, quarter, tax revenue, tax, tax on vehicular tenure         |
|         |       | pawn, auto parts, permittee, revalidation, inspection              |

| Policy     | Topic | Words                                                             |
|------------|-------|-------------------------------------------------------------------|
| procedural | 3     | director, management, legal, prudent, cite                        |
| procedural | 4     | ballot box, to place, alphabetical, count, tally                  |
| procedural | 6     | interior, rules of procedure, open, base on, work                 |
| procedural | 7     | portfolio, correspond, agenda, pending, opportunely               |
| procedural | 8     | discussion, abstention, debate, close, approve                    |
| procedural | 11    | videos, image, audio, recording, designate                        |
| procedural | 13    | extraordinary, newspaper, official, publish, issue                |
| procedural | 14    | electronic, system, cancel, close, register                       |
| procedural | 15    | MC, agree, background, like, vigor                                |
| procedural | 16    | will, majority, vote, negative, exempt                            |
| procedural | 17    | PVEM, PRI, motion, posterity, PANAL                               |
| procedural | 18    | gazette, publish, summarize, author, speaker                      |
| procedural | 19    | inventory, verify, inform, note, process                          |
| procedural | 21    | approach, practical, discussion, sovereignty, consider            |
| procedural | 26    | treasury, single, initiate, help, legal                           |
| procedural | 27    | manifest, proposition, revolution, sovereignty, later             |
| procedural | 28    | propose, vote, approve, economic, majority                        |
| procedural | 29    | intonate, anthem, protocol, intonation, message                   |
| procedural | 31    | elected, election, elect, integration, majority                   |
| procedural | 32    | govern, body, petition, work, instruction                         |
| procedural | 34    | opinion, decree (n), sense, vote, rule                            |
| procedural | 35    | chief, department, office, dependent, leadership                  |
| procedural | 36    | talk, congratulate, touch, take out, interesting                  |
| procedural | 39    | unanimity, exempt, event, positioning, positive                   |
| procedural | 40    | minutes, sovereign, abstention, refer, relative                   |
| procedural | 41    | serve, instruction, attendant, direction, hold                    |
| procedural | 42    | folio, stockpile, refer back, write, bulletin                     |
| procedural | 45    | permission, origin, continue, correspondence, copy                |
| procedural | 46    | urgent, resolution, respectfully, consider, affirmative           |
| procedural | 50    | inaudible, shade, effectively, merit, drafting                    |
| procedural | 52    | archives, ascertainment, discussion, summary, correction          |
| procedural | 53    | PRD, MC, PRI, PVEM, abstention                                    |
| procedural | 55    | congratulation, acknowledgment, to congratulate, effort, greeting |
| procedural | 57    | abstention, vote, voting, nominal, approve                        |
| procedural | 59    | continuous, previous, justify, start, record                      |
| procedural | 62    | install, formal, attempt, nail, purpose                           |
| procedural | 63    | side, governor, executive, deliver, govern                        |
| procedural | 66    | manifestation, abstain, screen, press, negative                   |
| procedural | 71    | return, vice-president, to coordinate, study, to distribute       |

| Policy     | Topic | Words                                                              |
|------------|-------|--------------------------------------------------------------------|
| procedural | 75    | instruction, governmental, path, treasury, send                    |
| procedural | 76    | debate, intervention, mix, sortition, continuation                 |
| procedural | 77    | rules, law, base, present, organic                                 |
| procedural | 80    | ceremony, original, return, discard, attorney                      |
| procedural | 81    | act, single, invite, present, date                                 |
| procedural | 82    | MC, mark off, validate, PRI, discard                               |
| procedural | 86    | turn, correspondence, copy, right away, refer                      |
| procedural | 87    | replicate, question, answer, effectively, questioning              |
| procedural | 89    | quorum, date, justify, legal, exhaust                              |
| procedural | 91    | guard, applause, cannon, sonorous, band                            |
| procedural | 92    | presidium, voting, virtue, vent, process                           |
| procedural | 93    | inauguration, inaugurate, finalize, friend, congratulate           |
| procedural | 95    | coat of arms, emblem, monumental, color, lake                      |
| procedural | 96    | applause, conventionality, occupy, amiability, promotional         |
| procedural | 98    | request, process, exempt, approve, unanimous                       |
| procedural | 99    | block, lot, street, town, corner                                   |
| procedural | 103   | silence, grand, save, composure, memory                            |
| procedural | 104   | separate, unanimity, nominal, register, to serve                   |
| procedural | 105   | identification number, amphora, distribute, to deposit, podium     |
| procedural | 109   | Morena, blueprint, PES, legislative coalition, group               |
| procedural | 112   | constitutional, date, to integrate, local, initiate                |
| procedural | 113   | gather together, coordination, political, preparatory, integration |
| procedural | 116   | sovereign, book, organic, base, attentively                        |
| procedural | 119   | constituent, solemnity, enact, mayoralty, constitutive             |
| procedural | 121   | internal, regimen, control, agreement, body                        |
| procedural | 122   | declaratory, formal, initiate, exert, term                         |
| procedural | 124   | greet, commander, certification, military, naval                   |
| procedural | 126   | member, sovereign, Morena, vacant, qualify                         |
| procedural | 127   | walker, street, drive, road, zone                                  |
| procedural | 130   | group, institutional, PRI, PRD, PAN                                |
| procedural | 132   | wall, golden, letters, legend, inscribe                            |
| procedural | 134   | consult, to list, function, legally, purpose                       |
| procedural | 135   | roundabout, discard, dependency, sound, minute                     |
| procedural | 136   | proposition, plenary, right away, urgent conclude                  |
| procedural | 137   | office, inform, procedural, mark off, transparency portal          |
| procedural | 140   | cancellation, inscription, necessary, public, require              |
| procedural | 146   | dictum, base, organic, result, relative                            |
| procedural | 147   | add, reform, fraction, institutional, addition                     |



| Policy     | Topic | Words                                                     |
|------------|-------|-----------------------------------------------------------|
| procedural | 151   | nominal, previously, opinion, take part, adjourn          |
| procedural | 153   | check, multiple, intrinsic, gather, verify                |
| procedural | 154   | statement, interrupt, present, begin, process             |
| procedural | 157   | greet, caravan, laborer, coincide, effectively            |
| procedural | 162   | add, issue, enact, decision, entrust                      |
| procedural | 165   | replacement, post holder, provisional, solemnly, retire   |
| procedural | 166   | notification, expedite, skilled, copy, domicile           |
| procedural | 168   | spokesperson, integration, committee, organic, constitute |
| procedural | 172   | to intervene, order, conclude, inform, power              |
| procedural | 174   | writer, birthday, poet, illustrious, death                |
| procedural | 186   | add, reform, repeal, decree (n), diverse                  |
| procedural | 200   | prosperity, protest, emanate, save, patriotic             |
| procedural | 201   | pluralism, capital, PH, replicate, inhabitant             |
| procedural | 202   | law, organic, power, plenary, executive                   |
| procedural | 203   | befriend, precisely, add, commitment, friend              |
| procedural | 204   | manifest, propose, subsequently, PVEM, present            |
| procedural | 214   | finalize, process, to serve, stamp, approve               |
| procedural | 218   | entity, aspect, partnership, moral, meaning               |
| procedural | 221   | process, stage, relevant, inquire, due                    |
| procedural | 222   | bicentennial, sentiment, indigence, slavery, nation       |
| procedural | 223   | autonomy, text, autonomous, beginning, precept            |
| procedural | 224   | flag, honor, patriotic, pay, patriotic symbol             |
| procedural | 225   | Colosio, effectively, simply, insecurity, support         |
| procedural | 232   | meeting, analysis, approved, affirmative, submit          |
| procedural | 237   | MORENA, no attendance, text, justify, demonstrate         |
| procedural | 238   | gazette, precept, PRD, device, generous                   |
| procedural | 247   | suitable, current, provision, regulation, effective date  |
| procedural | 256   | discussion, argue, decisive, add, rule                    |
| procedural | 262   | legal, free, sovereign, request, none                     |
| procedural | 266   | transparency portal, agency, numeral, available, mark     |
| procedural | 274   | resolutive, society, enroll, relative, sign               |
| procedural | 278   | urge, exception, SELAP, send, connect                     |
| procedural | 281   | mention, productivity, PRD, aspire, evident               |
| procedural | 282   | proponent, sound, endorsement, pause, mark                |
| procedural | 285   | excuse, equip, set, desk, black                           |
| procedural | 290   | minute, decree (n), affirmative, resolve, approve         |
| procedural | 294   | report, instructor, termination, trial, omission          |
| procedural | 295   | bulletin, Yaqui, argue, recently, obvious                 |
| procedural | 300   | fulfill, name, attend, respective, settle                 |

| Policy     | Topic | Words                                                                  |
|------------|-------|------------------------------------------------------------------------|
| procedural | 301   | include, establish, legal provision, property, subsidiary              |
| procedural | 303   | mayoralty, parliament, enactment, administrative boundary, proposition |
| procedural | 317   | document, register, capacity, inform, deputy                           |
| procedural | 327   | plenary, definitely, unload, refer to, pending                         |
| procedural | 328   | gazette, friendly, decree (v), capital, decree (n)                     |
| procedural | 333   | to dispatch, questioning, appearing, meaning, approach                 |
| procedural | 336   | feasibility, veto, withdrawal, absence, absentee                       |
| procedural | 338   | member, position, shift, pronouncement, issue (n)                      |
| procedural | 339   | according, pronouncement, convenient, situation, union                 |
| procedural | 342   | compete, identical, opposition, inter-American, deadline               |
| procedural | 356   | plenary, rule, speaker, develop, precedent                             |
| procedural | 360   | urgent, negative, affirmative, instruction, respectfully               |
| procedural | 362   | newsletter, discuss, solve, expository, citizen                        |
| procedural | 364   | inspector, consular, grade, accrue, follow up                          |
| procedural | 365   | committee, plenary, attend, performance, chapter                       |
| procedural | 389   | agreement, ruler, reasoning, prescribe, letter                         |
| procedural | 400   | ordinary, commission, approve, inform, incorporate                     |
| procedural | 401   | elapse, close, power, fraction, same                                   |
| procedural | 404   | auxiliary, assignment, ascribe, chapter, jurisdictional                |
| procedural | 405   | agenda, commitment, dread, consensus, strengthen                       |
| procedural | 412   | insertion, delegation, PRD, proposal, negative                         |
| procedural | 415   | unanimous, accustom, portfolio, objection, reinstate                   |
| procedural | 421   | initiator, character, redact, text, press                              |
| procedural | 426   | negotiate, money, company, cost, sell                                  |
| procedural | 435   | proceeding, excerpt, deed, existing, portfolio                         |
| procedural | 436   | debate, enclose, motion, raise, argue                                  |
| procedural | 440   | proceed, quote, legal, present, public                                 |
| procedural | 443   | enter, into force, publish, official, journal                          |
| procedural | 444   | reopening, warning, location, section, misled                          |
| procedural | 446   | affirmative, initiator, instruction, ruler, instruct                   |
| procedural | 450   | organizer, should, consider, necessary, social                         |

| Abbreviation     | Definition                                                       |
|------------------|------------------------------------------------------------------|
| MC               | Citizen's Movement Party                                         |
| PAN              | National Action Party                                            |
| PRD              | Revolutionary Democratic Party                                   |
| PRI              | Revolutionary Institutional Party                                |
| PVEM             | Green Party                                                      |
| PANAL            | New Alliance Party                                               |
| PES              | Social Encounter Party                                           |
| PH               | Humanist Party                                                   |
| Morena           | National Regeneration Movement Party                             |
| DIF              | Institute of Family Development                                  |
| EPN              | Enrique Pena Nieto (Mexico's President 2012-2018)                |
| SAGARPA          | Ministry for Agriculture, Farming and Fishing                    |
| CONEVAL          | National Council for the Evaluation of Social Development Policy |
| INE              | National Electoral Institute                                     |
| INAH             | National Anthropology and History Institute                      |
| INEGI            | National Institute of Statistics and Geography                   |
| SELAP            | Legislative Liaison and Political Agreements Sub-ministry        |
| INFONAVIT        | Institute for the National Workers' Housing Fund                 |
| IVA              | Value Added Tax                                                  |
| SEDATU           | Ministry for Agrarian, Urban and Territorial Development         |
| CFE              | Federal Electricity Commission                                   |
| IEPS             | Special Tax on Production and Services                           |
| PEMEX            | Mexican Petroleum                                                |
| OECD             | Organization for Economic Co-operation and Development           |
| OFS              | Court of Audit                                                   |
| BANOBRAS         | National Bank of Public Works and Services                       |
| UNAM             | Mexican National Autonomous University                           |
| Pacto por Mexico | 2012 Federal Accord between the PRI, PAN and PRD                 |
| AMLO             | Andres Manuel Lopez Obrador (Presidential candidate 2018)        |
| COPECOL          | Permanent Conference of Local Congresses                         |
| (v)              | verb                                                             |
| (n)              | noun                                                             |

**Table A18: Original text Snippets for topics on Health and Education**

| Topic     | Policy          | Original text snippet in English                                                                                                                                                                                                                                                                                                                                                                                                                                                                                                                                                                                                                                                                                                                                                                                                                                                                                                                                                                                                                                        |
|-----------|-----------------|-------------------------------------------------------------------------------------------------------------------------------------------------------------------------------------------------------------------------------------------------------------------------------------------------------------------------------------------------------------------------------------------------------------------------------------------------------------------------------------------------------------------------------------------------------------------------------------------------------------------------------------------------------------------------------------------------------------------------------------------------------------------------------------------------------------------------------------------------------------------------------------------------------------------------------------------------------------------------------------------------------------------------------------------------------------------------|
| Education |                 |                                                                                                                                                                                                                                                                                                                                                                                                                                                                                                                                                                                                                                                                                                                                                                                                                                                                                                                                                                                                                                                                         |
| 72        | general         | Law Initiative regarding the Provision of Childcare Services for the State of Guerrero [...] It is necessary to regulate daycare centers within our legal framework so that they do not get established in dangerous and unhealthy places, to ensure the quality of care to achieve a more efficient comprehensive operation, as well as to comply with the legal requirements which are applied by the authorities. The law proposed in this initiative includes the regulation of personal service facilities, the requirements of day care centers, medical care of minors, the delivery of minors at the exit, the guarantee of access to children with non-dependent disabilities, as well as the procedures regulating their verification and surveillance, and, in the event of any violation of this law, their respective infractions and sanctions...                                                                                                                                                                                                         |
| 78        | particularistic | Proposal to issue the Profession Law of the State of Sinaloa [...] this new law establishes the mechanisms for professional certification and endorsement, as well as the certifying bodies that will be authorized and supervised by the educational authority. Even though professional certification will be voluntary for professionals, these will allow us to assess their level of competence and the degree of updating, in relation to the knowledge of the profession or professional branch, as well as the skills and aptitudes they possess [...] the certifying bodies will be the professional boards themselves, which are thus accredited by the educational authority [...] Here in this new Law, we establish the rules and requirements for its functionality. We are dedicating a complete chapter to guarantee the rules for their constitution, registration, attributions and obligations given the importance that professional boards will have in this new legal design ...                                                                  |
| 125       | general         | THE COUNTRY HAS LIVED A HISTORICAL PROCESS OF BIG CHANGES IN LEGISLATIVE MATTERS. THE EDUCATIONAL SECTOR HAS BEEN IMPACTED BY THE REFORMS TO ARTICLES 3 AND 73 OF THE POLITICAL CONSTITUTION. FROM WHICH THE FOLLOWING SECONDARY LAWS DERIVE: THE GENERAL LAW OF EDUCATION, THE GENERAL LAW OF THE PROFESSIONAL TEACHING SERVICE, AND THE LAW OF THE NATIONAL INSTITUTE FOR THE EVALUATION OF EDUCATION [...] ITS FUNDAMENTAL OBJECTIVE IS TO INCREASE THE QUALITY OF EDUCATION FROM RECOGNIZING TEACHERS AS THE MAXIMUM EXPONENTS OF EDUCATION, THE STUDENT AS THE CENTER, AND SOCIETY AS THE STRATEGIC PARTNER. DURANGO HAS GIVEN ITSELF THE TASK OF HARMONIZING ITS POLITICAL CONSTITUTION AND THE LAW OF EDUCATION IN THE STATE, IN WHICH IT IS ESTABLISHED THAT EVERY INDIVIDUAL HAS THE RIGHT TO RECEIVE A QUALITY EDUCATION...                                                                                                                                                                                                                                   |
| 198       | general         | Law Initiative to create the Law to Prevent and Combat School Violence in the State of Tlaxcala [...] This Law is of public order and social interest and is intended to prevent and combat school violence, to eradicate it from both public and private educational institutions from the basic level to the upper secondary level. The application of this law is intended to I Guarantee the physical and psychological integrity of students at the basic and upper secondary level for their full educational development II Guarantee the right of minors to live in an environment of school harmony, ethical training, equality and violence-free [...] VI Establish mechanisms and procedures to prevent combat and eradicate school violence (school harrasment, peer violence, or bullying) VII Promote inter-institutional coordination to prevent combat and eradicate school violence and VIII Involve all sectors of society and especially to the parents of children of school age in the prevention of combat and eradication of school violence ... |
| 254       | particularistic | AUTHORIZATION TO DISINCORPORATE A MUNICIPAL LAND PLOT AND TO DONATE IT IN FAVOR OF THE NATIONAL SOCIAL SECURITY UNION SECTION XIV [...] The municipality holds full domain over the land that constituted the so-called Municipal Aviation field in 1964. The land is duly registered with the Public Registry of Property and Commerce, which has served as a legal instrument in various applications for the disincorporation of lands and buildings, such as the buildings of the Judicial Power, the Military Garrison and Sector Police Administrative Unit. Topographic Map Attached. The Town hall Act in which the agreement is established by which the aforementioned property is granted in donation to the aforementioned Union...                                                                                                                                                                                                                                                                                                                         |

| Topic | Policy          | Original text snippet in English                                                                                                                                                                                                                                                                                                                                                                                                                                                                                                                                                                                                                                                                                                                                                                                                                                                                                                                                                                                                                                                                                                                                                                                                                                                                                                                                                                                                                                                                                                                                                                                                                                                                                                                                                                                                                                                                   |
|-------|-----------------|----------------------------------------------------------------------------------------------------------------------------------------------------------------------------------------------------------------------------------------------------------------------------------------------------------------------------------------------------------------------------------------------------------------------------------------------------------------------------------------------------------------------------------------------------------------------------------------------------------------------------------------------------------------------------------------------------------------------------------------------------------------------------------------------------------------------------------------------------------------------------------------------------------------------------------------------------------------------------------------------------------------------------------------------------------------------------------------------------------------------------------------------------------------------------------------------------------------------------------------------------------------------------------------------------------------------------------------------------------------------------------------------------------------------------------------------------------------------------------------------------------------------------------------------------------------------------------------------------------------------------------------------------------------------------------------------------------------------------------------------------------------------------------------------------------------------------------------------------------------------------------------------------|
| 267   | general         | The Autonomous Metropolitan University, as a higher education institution, has been characterized since its inception in 1973 for being innovative and for contributing to the learning of younger generations. In its four decades with projection into the future, today's achievements have been the result of 40 years of research, education and continuous teaching. Today the UAM is one of the most well-known and recognized platforms for public education at the national and international level [...] The campuses that comprise it were created in response to a metropolitan need to have a greater number of spaces for young people from the capital to be trained as the professionals of tomorrow who will take this Mexican capital to its optimal growth and sustainability in its development. Likewise, in addition to its vision of sustainability and its technological and cultural achievements, all of its campuses have world-class research and teaching [...] By virtue of this, I take the moment to reaffirm our commitment to contribute with our actions and legislative tasks to the development and innovation of social and environmental education, with the sole objective of building a promising future...                                                                                                                                                                                                                                                                                                                                                                                                                                                                                                                                                                                                                                               |
| 313   | particularistic | The Education Law of the State of Guerrero establishes the competences of the National Institute for the Evaluation of Education. These include, among others, the evaluation of the national educational system in preschool, primary, secondary and upper secondary education [...] in the present reforms, additions and derogations proposed to the Education Law of the State of Guerrero, it is considered pertinent to modify the third article, which establishes the recognition of the rights and achievements of education workers. So that, as they are recognized by the educational authorities, in the labor negotiation process of the union's petition documents, they become rights for the benefit of their representatives [...] the authorities must apply performance evaluations derived from the guidelines issued by the National Institute for the Evaluation of Education. The local educational authorities will grant the corresponding certification to teachers who obtain satisfactory results and will offer training courses and regularization programs to those with deficiencies [...] The State will grant a decent professional salary that allows teachers to achieve a decent standard of living and enjoy decent housing, as well as having the necessary time to prepare for the classes they teach, and to carry out activities aimed at their personal and professional development [...] The local educational authorities will give recognitions (distinctions, incentives and rewards) to educators who excel in the exercise of their profession and, in general, will carry out activities that foster greater social appreciation for the work carried out by teachers. In addition, they will establish mechanisms of encouragement (granting of recognitions, distinctions, incentives and rewards) to teachers based on their evaluation ... |
| 349   | particularistic | Draft Decree Initiative containing the issuance of Scholarships and Incentives of the State of Durango [...] POSTGRADUATE SCHOLARSHIP FUND. The Government of the State of Durango will have a Postgraduate Scholarship Fund, which will aim to promote the development and academic training of young people from Durango through the granting of postgraduate scholarships that facilitate their access to quality programs in the country or abroad, seeking to enhance their skills under the commitment of the scholarship holder to apply once he or she has finished his or her studies for the benefit of the social, technological, economic, political, academic or cultural development of the State of Durango...                                                                                                                                                                                                                                                                                                                                                                                                                                                                                                                                                                                                                                                                                                                                                                                                                                                                                                                                                                                                                                                                                                                                                                      |
| 387   | particularistic | Initiative with Character of Judgment by which we issue the call for young Tlaxcaltecas, interested in participating in the election process to integrate the Fifth Youth Parliament: Young Character Voices of Tlaxcaltecas 2016 [...] the Sixty-First Legislature conducts this Fifth Youth Parliament, called Young Character Voices of Tlaxcaltecas 2016, through which we offer the opportunity to focus the attention of different young people of the State, having as a primary objective to guarantee the recognition and participation of the youth, who are the present and the future of our State [...] This type of space must be guaranteed so that young people can be partners in decision-making that is of importance for the benefit of the Tlaxcaltecan society ...                                                                                                                                                                                                                                                                                                                                                                                                                                                                                                                                                                                                                                                                                                                                                                                                                                                                                                                                                                                                                                                                                                           |
| 398   | general         | Draft Decree Initiative to reform various provisions of the State Law for the Integration and Social Development of people with Disabilities [...] In this Initiative, we are including the concept of the International Convention on the Rights of Persons with Disabilities. The obligation of the State on inclusive education and the right for people with disabilities to study in regular primaries and middle schools and the obligation of schools to prepare to serve people with disabilities ...                                                                                                                                                                                                                                                                                                                                                                                                                                                                                                                                                                                                                                                                                                                                                                                                                                                                                                                                                                                                                                                                                                                                                                                                                                                                                                                                                                                      |
| 423   | particularistic | The State Legislature approves the creation of the UAZ-ISSSTE Trust to guarantee the payment of their debt. The trust had a tripartite contribution from the Federation, the State and the University for 45 million pesos [...] the Ministry of Education contributes 60 million pesos and assumes the commitment to contribute 600 million pesos over the next ten years for the Construction of the XXI Century Campus on the 50 hectares donated by the State Government. The Autonomous University of Zacatecas assumes the commitment to deliver six buildings with a value of 100 million pesos [...] Today, the commitment of 45 million pesos annually is assumed in a different tripartite way, 15 million the Legislature, 15 million the Federal Government and 15 million the University...                                                                                                                                                                                                                                                                                                                                                                                                                                                                                                                                                                                                                                                                                                                                                                                                                                                                                                                                                                                                                                                                                           |

| Topic  | Policy          | Original text snippet in English                                                                                                                                                                                                                                                                                                                                                                                                                                                                                                                                                                                                                                                                                                                                                                                                                                                                                                                                                                                                                                                                                                                                                                                                |
|--------|-----------------|---------------------------------------------------------------------------------------------------------------------------------------------------------------------------------------------------------------------------------------------------------------------------------------------------------------------------------------------------------------------------------------------------------------------------------------------------------------------------------------------------------------------------------------------------------------------------------------------------------------------------------------------------------------------------------------------------------------------------------------------------------------------------------------------------------------------------------------------------------------------------------------------------------------------------------------------------------------------------------------------------------------------------------------------------------------------------------------------------------------------------------------------------------------------------------------------------------------------------------|
| Health |                 |                                                                                                                                                                                                                                                                                                                                                                                                                                                                                                                                                                                                                                                                                                                                                                                                                                                                                                                                                                                                                                                                                                                                                                                                                                 |
| 49     | general         | The deputies member of the Finance Commission present you with the following draft DECREE THROUGH WHICH VARIOUS PROVISIONS OF THE FINANCE LAW OF THE STATE OF GUERRERO NUMBER 428 ARTICLE ONE ARE REFORMED [...] One of the main modifications presented in this initiative refers to the addition of recovery fees, and fees for the provision of various health services and protection against health risks, provided by the Ministry of Health. Said services are already provided to citizens, but are not established in the Tax Law of the State of Guerrero, number 428, for which purpose, we aim to regulate their collection [...] The amount of the quotas mentioned will be determined attending to the socioeconomic conditions of the applicant according to the following Tabulator. CATALOG OF MEDICAL ASSISTANCE AN LABORATORY SERVICES FOR THE COLLECTION OF RECOVERY FEES FOR THE GEOGRAPHICAL ZONE A, BILLING BY SOCIOECONOMIC LEVELS: General Consultation, Emergency Consultation, Observation from 2 to 12 pm, Hydration day, Hydration bed , Incubator Day [...] Lymph node removal, Mastectomy, Umbinical and Paraumbical hernia, Removal of malignant skin tumors, Removal of benign skin tumors ... |
| 90     | general         | Draft Decree Initiative creating the Law for Comprehensive Care of Chronic Kidney Disease in the State of Tlaxcala [...] In the First Title of the General Provisions, the Law mentions the following objectives I To decrease the rate of Morbidity and mortality due to Chronic Kidney Disease II Detect cases of Chronic Kidney Disease in the population of the State of Tlaxcala in a timely manner through screening [...] The Third Title refers to the creation of the Comprehensive Care Program for Chronic Kidney Disease in the State of Tlaxcala, which provides for the right of every person residing in the State to be offered Comprehensive Care for Chronic Kidney Disease, through actions to promote health, prevention, counseling, detection, diagnosis and treatment of kidney diseases ...                                                                                                                                                                                                                                                                                                                                                                                                             |
| 102    | general         | The Commissions of Legislative Studies and Constitutional Points, and of Health, Sport and Healthy Recreation received for their analysis, study, and corresponding opinion, two Draft Decree Initiatives: the first relating to the Law on Transplants and Organ Donation for the State, and the second regarding to the Law for the Promotion of a Culture of Donation Procurement and Transplantation of Organs and Tissues for the State of Colima [...] The project has 15 chapters and 128 articles and contemplates the establishment of the State Transplant Council. This agency will depend on Colima's Health Ministry and will be responsible for coordinating, promoting and consolidating the culture of organ and tissue donation of human beings for therapeutic purposes. Its integration and operation will be in accordance with the respective Regulation. The project also contemplates the creation of the State Registry of Donors of the State of Colima, which will have the primary objective of effectively ensuring compliance and observance of the will of the person who expressly donates their organs and tissues in the terms provided by applicable legislation...                           |
| 123    | general         | LAW INICIATIVE ON THE RIGHTS AND PALLIATIVE CARE OF THOSE SICK AT A TERMINAL STAGE [...] This law is of public order and social interest and aims to establish mechanisms to guarantee the right of people to advance their will in the State of Sonora, with respect to their refusal to undergo medical treatments or procedures, which would unnecessarily prolong their life when, for medical reasons, it is impossible to maintain it naturally, providing palliative treatments, protecting at all times the dignity of person...                                                                                                                                                                                                                                                                                                                                                                                                                                                                                                                                                                                                                                                                                        |
| 131    | general         | Law Initiative to reform Constitution of the State of Sonora in order to update it in the area of combating drug addiction and gambling in our State [...] what the law proposes is that we expand that fraction eight [of the Constitution] so that we can make laws to combat alcoholism, drug addiction and gambling ...                                                                                                                                                                                                                                                                                                                                                                                                                                                                                                                                                                                                                                                                                                                                                                                                                                                                                                     |
| 179    | particularistic | Colima has the lowest risk of dying during pregnancy, childbirth or puerperium, as well as the best prognosis for life at birth and the lowest ratio of maternal death for the sixth consecutive year. To continue this trend, supplies, training and equipment have been purchased for 263 million pesos [...] to promote the prevention of unplanned pregnancies, promoting responsible motherhood and fatherhood, we guarantee the supply of more than 10 new technology contraceptive options in all the Health Units, with an investment of 5 million 507 thousand 753 pesos ...                                                                                                                                                                                                                                                                                                                                                                                                                                                                                                                                                                                                                                           |
| 265    | general         | Point of Agreement Proposal by which the Executive of the State of Tabasco is exhorted to instruct the Secretary of Health, to coordinate and develop a process of social mobilization, which commits all state agencies to contribute to the prevention , control, and elimination of outbreaks of diseases transmitted by the Aedes Aegypti Mosquito, which cause diseases such as Dengue, Chikungunya, and now Zika in the State, and to present to us the Response Plan to the situation described and based on the epidemiological alert...                                                                                                                                                                                                                                                                                                                                                                                                                                                                                                                                                                                                                                                                                |

| Topic | Policy  | Original text snippet in English                                                                                                                                                                                                                                                                                                                                                                                                                                                                                                                                                                                                                                                                                                                                                                                                                                                                                                                                                                                                                  |
|-------|---------|---------------------------------------------------------------------------------------------------------------------------------------------------------------------------------------------------------------------------------------------------------------------------------------------------------------------------------------------------------------------------------------------------------------------------------------------------------------------------------------------------------------------------------------------------------------------------------------------------------------------------------------------------------------------------------------------------------------------------------------------------------------------------------------------------------------------------------------------------------------------------------------------------------------------------------------------------------------------------------------------------------------------------------------------------|
| 347   | general | Point of Agreement Proposal to respectfully exhort the Government of the State of Mexico and of the 125 Municipalities in the State to promote in all the Clinics and Public Hospitals of the State of Mexico the creation of a pavilion or area specialized in prevention, identification and comprehensive care for minors with suspected child abuse...                                                                                                                                                                                                                                                                                                                                                                                                                                                                                                                                                                                                                                                                                        |
| 352   | general | THE WORLD HEALTH ORGANIZATION EMPHASIZED THE NEED TO SUPPORT POLICIES THAT PROMOTE HEALTHY INCREASE IN PHYSICAL ACTIVITY AND MAINTENANCE OF A HEALTHY BODY WEIGHT TO PREVENT TYPE 2 DIABETES. THE STATE'S DIABETES WEEK HAS TO PURPOSE TO INCREASE AWARENESS ABOUT DIABETES, GIVEN THE RECENT INCREASES IN DIABETES RELATED MORBIDITY RATES [...] THIS WEEK, THE HEALTH MINISTRY EMITTED THE DECLARATORY OF SANITARY EMERGENCY FOR THIS SUBSEQUENT PERIOD [...] BECAUSE OF THE DECLARATION OF SANITARY EMERGENCY, THE MEXICAN INSTITUTE OF SOCIAL SECURITY WILL PROMOTE A NEW MODEL OF CARE AGAINST DIABETES, AS THIS REPRESENTS AN ANNUAL COST OF 51 BILLION PESOS. THE NEW SCHEME WILL START THE FIRST QUARTER OF YEAR 2017 IN THE FAMILY MEDICINE UNITS, WHICH WILL DETERMINE RISK GROUPS IN THE POPULATION TO PREVENT NEW CASES ...                                                                                                                                                                                                           |
| 397   | general | The Permanent Commission of the Sixtieth Legislature of the Honorable Free and Sovereign Congress of the State of Guerrero makes an attentive and respectful exhort to Ángel Heladio Aguirre Rivero, so that the Health Ministry implements and carries out informative and preventive campaigns to avoid an epidemic as a consequence of contagion and complications from the AH1N1 virus [...] to distribute to the Entity's health centers a sufficient quantity of vaccines for the different types of influenza, mainly AH1N1, to carry out health campaigns and to vaccinate mainly minors and adult people with obesity, diabetes, cancer, HIV and pregnant women among others, according to what is stated in the manual of the Ministry of Health...                                                                                                                                                                                                                                                                                     |
| 402   | general | ECONOMIC AGREEMENT BY WHICH WE ASK THE HEAD OF THE HEALTH MINISTRY TO EVALUATE, IN COORDINATION WITH THE FEDERATIVE ENTITIES, THE INTERVENTION GUIDE OF THE ACTION PROGRAM TO OVERCOME MENTAL HEALTH PROBLEMS, ISSUED BY THE FIRST PERMANENT HEALTH COMMISSION. IN MEXICO, WE GO THROUGH A MARKED POPULATION AND EPIDEMIOLOGICAL TRANSITION, WHICH HAS IMPORTANTLY IMPACTED THE MENTAL HEALTH PROFILE OF THE POPULATION. THIS IS IMPORTANT BECAUSE MENTAL HEALTH IMPACTS THE RISKS OF GETTING NON-TRANSMISSIBLE AND TRANSMISSIBLE DISEASES AND THE OCCURRENCE OF INTENTIONAL AND NON-INTENTIONAL HARMS. MOREOVER, THE STIGMATIZATION OF MENTAL ILLNESS CONTINUES TO BE AN OBSTACLE FOR THOSE WHO SUFFER THEM. IT IS IMPORTANT THAT PEOPLE FIND THE SUPPORT AND THE NECESSARY INFORMATION ABOUT THEIR CAUSES, CONSEQUENCES AND POSSIBLE SUBSEQUENT TREATMENTS. THEREFORE, PREVENTION OF MENTAL DISORDERS AND MENTAL HEALTH PROMOTION NEEDS TO BE AN INTEGRAL PART OF PUBLIC HEALTH POLICY...                                                       |
| 406   | general | During the month of October, specifically on October 19th, the World Day to Combat Breast Cancer is celebrated and for this reason, conferences, medical workshops and free mammography studies are held during this month to promote awareness, but also to to publicize the advances out there in its early detection and the importance of prevention [...] Public instances, political bodies, civil associations and health organizations join efforts to raise awareness about breast cancer, a disease that affects not only women but also men. It is of utmost importance to know how to detect it in time, to know its treatment and, of course, to keep in mind what the post-treatment care may be. In the framework of the Social Programs we carry out, we place special emphasis on the activities of this October. In all the fixed and mobile medical offices across the state we redouble our efforts to listen to women and men, in order to detect possible early signs that indicate the presence of this type of cancer ... |
| 434   | general | Point of Agreement to exhort mayors and municipalities to make the corresponding adjustments, in order to eliminate references to the minimum wage and establish the Measurement and Update Unit (UMA) in their services catalogue [...] Changes to TABASCO'S STATE FINANCE LAW REGARDING CLINICAL SERVICES (NUMBERS IN UMA): CYTOLOGY, IMMUNOTHERAPY, SPECIFIC VACCINES, INHALATORY FOOD ALLERGY PANEL [...] TEST OF SENSITIVITY TO PENICILLIN, RADIOTHERAPY, MAJOR URGENCY SUTURES, MINOR URGENCY SUTURES [...] LATERAL CEPHALOGRAM, SURGERY X-RAY, ENDODONTIC RADIOGRAPHY, PERIODONTIC RADIOGRAPHY, PROTESIS, OCCLUSAL RADIOGRAPHY, PANORAMIC RADIOGRAPHY...                                                                                                                                                                                                                                                                                                                                                                                   |

**Table A19: Original text Snippets for topics on Unions**

| Topic  | Policy          | Original text snippet in English                                                                                                                                                                                                                                                                                                                                                                                                                                                                                                                                                                                                                                                                                                                                                                       |
|--------|-----------------|--------------------------------------------------------------------------------------------------------------------------------------------------------------------------------------------------------------------------------------------------------------------------------------------------------------------------------------------------------------------------------------------------------------------------------------------------------------------------------------------------------------------------------------------------------------------------------------------------------------------------------------------------------------------------------------------------------------------------------------------------------------------------------------------------------|
| Unions |                 |                                                                                                                                                                                                                                                                                                                                                                                                                                                                                                                                                                                                                                                                                                                                                                                                        |
| 313    | particularistic | Draft decree to reform, add, and repeal various provisions of the State of Guerrero's Education Law of the [...] The provisions provided in the General Law of the Professional Teaching Service and the Law of the National Institute for the Evaluation of the Education must be fulfilled in the entity within the terms provided in said laws, in accordance with the provisions of Title Eight of this law. For the personnel regulated by the General Law of the Professional Teaching Service, the provisions in the Workers' at the Service of the Secretary of Education Guerrero Scale Regulations are repealed for workers affiliated to the National Union of Education Workers Section 14, as well as those affiliated to the Unique Union of Public Servants of the State of Guerrero... |
| 169    | particularistic | Official letter Number 908, signed by the Members of the Executive Committee and Members of the Union of Workers at the Service of the City, DIF and COMAPAT of the municipality of Tecomán, Col. [...] through which, they request this Sovereignty its immediate intervention so that resources, illegitimately appropriated by the City, DIF and COMAPAT, are returned [...] They request that the budgeted benefits that have not been delivered to date are paid. In the same way, they request a review of the income and expenditure budget of the municipalities and the State; especially, that the Public Accounts of the DIF and COMAPAT of Tecomán City are thoroughly analyzed, considering that resources might be being deviated from these public institutions...                      |
| 307    | particularistic | REVIEW OF THE COLLECTIVE LABOR CONTRACTS, ESPECIALLY AS RELATED TO INCREASES IN WAGES (PERCENTAGES), AS AGREED BY THE PARTIES THAT NEGOTIATE THEM [...] THE ANNUAL REVIEWS OF COLLECTIVE LABOR CONTRACTS HAS ALLOWED THIS ENVIRONMENT OF JOB STABILITY IN THE STATE [...] ON AVERAGE TERMS, THE INCREMENT ACHIEVED BY WORKERS HAS BEEN 6%, THAT REALLY SPEAKS WELL OF THE WORKERS UNION AND IT ALSO SPEAKS WELL OF THE COMPANIES, BECAUSE AT NATIONAL LEVEL, THE INCREMENT WAS ONLY OF 4.2% [...] FORTUNATELY, EVERY YEAR THE AGREEMENTS HAVE BEEN REVISED AND FAVORABLY RESOLVED FOR BOTH NEGOTIATING PARTS ...                                                                                                                                                                                       |
| 254    | particularistic | Draft Agreement regarding the delivery of the Award Unity, Pride and Magisterial Commitment [...] The agreement's call indicates the creation of an Organizing Commission for the delivery of the AWARD UNITY PRIDE AND MAGISTERIAL COMMITMENT and its corresponding monetary stimulus, with the participation of the Directors of the State's Department of Public Education, the Director General of the State Educational Services Unit, Section 31 of the National Union of Education workers, Section 55 of the National Union of Education workers, the Juárez Blancas Union, the Justo Sierra and Mártires of 1910 Union, to be chaired by the President of the Education Culture Science and Technology Commission of this Legislature...                                                      |
| 173    | particularistic | AGREEMENT BY WHICH A NEW CIVIL PENSIONS LAW IN THE STATE OF CHIHUAHUA IS CREATED [...] the proposed law contemplates the benefit of death insurance, which applies in favor of the bereaved of the worker who dies due to natural causes or accidents and even due to causes beyond the control of the public service. When the widowhood and orphan's pension proceeds, only one year of contributions to the pension institute suffices, which is a clear example of the benefits of this new law. The new law recognizes pension benefits to all active workers, including those with less than 15 years of service, which is not the case with the current law, which requires 15 years of contribution service for the granting of such benefits ...                                              |
